# Supplementary material for: Circadian programming of the ellipsoid body sleep homeostat in Drosophila
Source: eLife journal article supplement (doi:10.7554/elife.74327), 2022-06-23

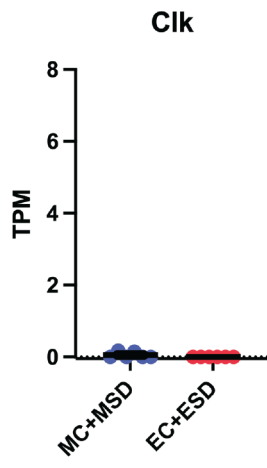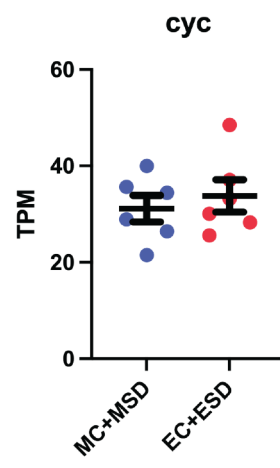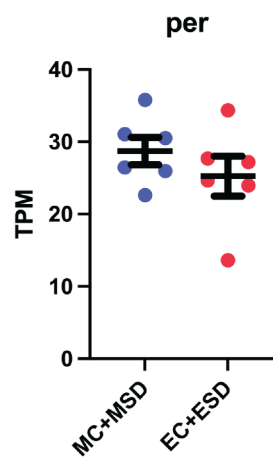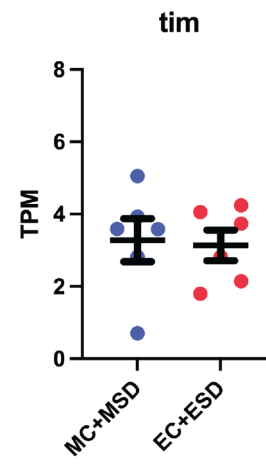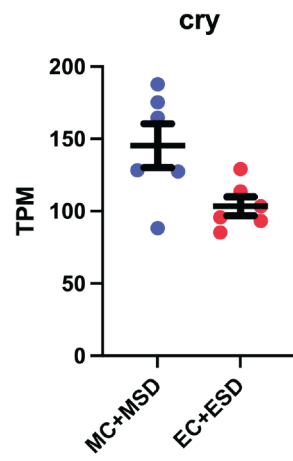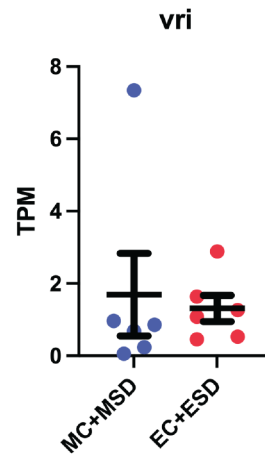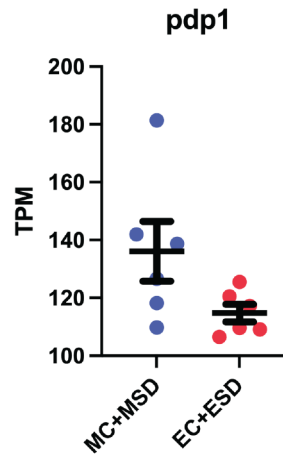

**Clk**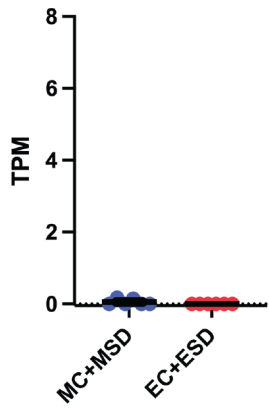**cyc**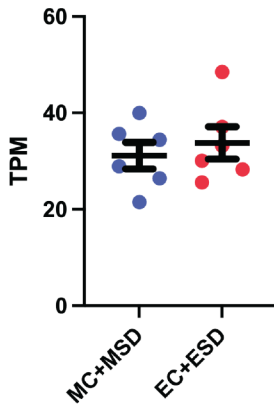**per**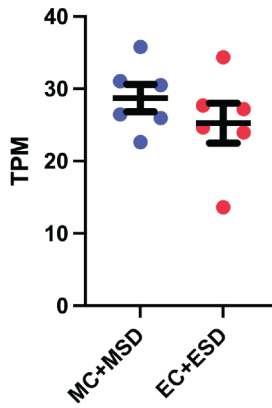**tim**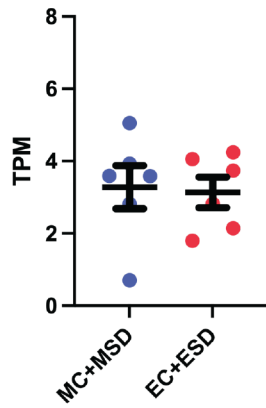**cry**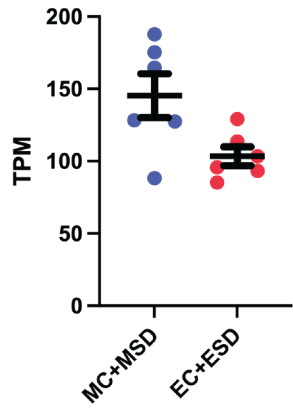**vri**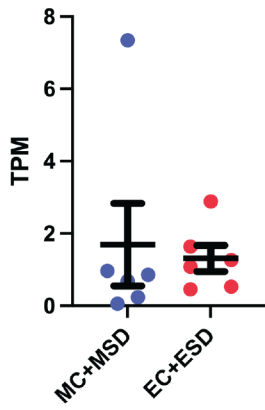**pdp1**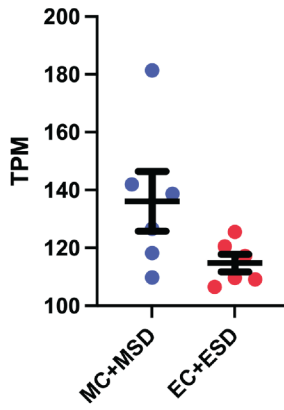

Supplement: fig8-figsupp1-data1 [file elife-74327-fig8-figsupp1-data1-v2.pdf]
