# Supplementary material for: Circadian programming of the ellipsoid body sleep homeostat in Drosophila
Source: eLife. 2022 Jun 23;11:e74327. doi: 10.7554/eLife.74327 (PMC9270026; doi:10.7554/eLife.74327)
Supplement: Figure 1—source data 1. [file elife-74327-fig1-data1.xlsx]

## Sheet: Figure 1
Figure 1a
	ZT0	ZT0.5	ZT1	ZT1.5	ZT2	ZT2.5	ZT3	ZT3.5	ZT4	ZT4.5	ZT5	ZT5.5	ZT6	ZT6.5	ZT7	ZT7.5	ZT8	ZT8.5	ZT9	ZT9.5	ZT10	ZT10.5	ZT11	ZT11.5	ZT12	ZT12.5	ZT13	ZT13.5	ZT14	ZT14.5	ZT15	ZT15.5	ZT16	ZT16.5	ZT17	ZT17.5	ZT18	ZT18.5	ZT19	ZT19.5	ZT20	ZT20.5	ZT21	ZT21.5	ZT22	ZT22.5	ZT23	ZT23.5	ZT0
Average sleep	3.13333	1.5	1.13333	4.7	6	7.26667	8.43333	10.3667	13	14.0333	15.8667	17.0667	14.6333	14.3333	10.6333	13	13.9667	9.13333	5.5	1.8	2.06667	1.13333	1.63333	0	12.4333	20.7	22.5333	23.4667	23.0333	24.8667	23.5667	23.4667	24.0333	25.2667	22.7	22.4667	23.8	23.5333	25.3333	25.5333	25.5667	25.6333	25.9	25.4333	27.3	24.9333	23.3333	23.6	0
standard deviation	3.54997	4.80481	2.76347	9.68878	10.0687	10.2518	10.7661	11.3426	11.8758	11.1587	11.5899	11.8843	12.033	12.3046	11.2816	11.3563	11.0562	11.5542	8.55308	4.45204	4.85609	2.99117	5.81012	0	8.34466	10.3028	8.98172	8.45978	7.70796	6.88694	8.08013	8.7286	5.84562	7.13869	8.29271	8.93939	7.67171	6.69397	8.07864	8.25346	6.99598	6.28344	6.49854	7.8287	6.31446	8.31257	10.2867	8.88858	0
Standard error	0.648133	0.877234	0.504539	1.76892	1.83829	1.87171	1.96561	2.07086	2.16821	2.03729	2.11602	2.16977	2.19691	2.2465	2.05973	2.07337	2.01858	2.10949	1.56157	0.812828	0.886597	0.546111	1.06078	0	1.52352	1.88103	1.63983	1.54454	1.40727	1.25738	1.47522	1.59362	1.06726	1.30334	1.51403	1.6321	1.40066	1.22215	1.47495	1.50687	1.27728	1.14719	1.18647	1.42932	1.15286	1.51766	1.87808	1.62283	0
Figure 1b
Time (ZT)	Baseline sleep	Sleep lost	Sleep during rebound
0	3.13333
0.5	1.5
1	1.13333
1.5	4.7
2	6	0
2.5	7.26667	0
3	8.43333	0.352941
3.5	10.3667	1.17647
4	13	1.82353
4.5	14.0333		26.7647
5	15.8667		27.8235
5.5	17.0667		28.5882
6	14.6333		27
6.5	14.3333		25.4706
7	10.6333		24.6471
7.5	13		21.4118
8	13.9667		19.2353
8.5	9.13333
9	5.5
9.5	1.8
10	2.06667
10.5	1.13333
11	1.63333
11.5	0
Figure 1c
	Control		FD
Time (CT)	Mean	SE	Mean	SE
0	13.0526	2.36751	22.7368	6.91631
0.5	15.3684	3.8739	15.3684	3.56904
1	19.1053	4.94644	12.9474	3.29582
1.5	21.4737	4.31397	17	4.52349
2	21	2.93895	24.8421	4.53915
2.5	11.1053	2.69816	22.0526	4.94205
3	14.6842	3.29988	21.7895	4.85074
3.5	20.2105	3.81178	16.8421	2.96496
4	20.4211	3.80851	16.6316	4.97668
4.5	20.5263	3.27258	18.7368	4.90127
5	19.9474	3.86124	18.6842	5.42091
5.5	14.2105	2.71834	14.9474	3.90791
6	19.1579	3.37107	21.3158	4.18718
6.5	25.6316	4.48272	26.4211	8.7724
7	24.6842	4.23716	22.0526	4.52897
7.5	24.1579	4.14592	24.3158	5.46978
8	27.1579	4.52431	28.5263	5.23672
8.5	23.3158	3.38646	31.3158	5.41497
9	28.5789	4.00534	34.0526	6.99058
9.5	24.6842	4.25025	28.3158	5.53989
10	25.2105	4.01938	33.5263	5.84816
10.5	29.6316	4.00089	32.3684	5.7207
11	28.0526	4.31607	31.4211	5.66528
11.5	26.3158	3.91955	31.5263	5.98359
12	24.5789	4.01482	36.1053	6.20691
12.5	30.3684	4.34762	32.1579	6.0011
13	26.9474	4.22293	31.7368	5.37965
13.5	22.8421	3.62437	26	4.94413
14	18.6842	2.95389	23.4737	6.23064
14.5	16.2632	3.58672	20.6842	5.19337
15	12.7368	3.7618	14.8421	4.54623
15.5	5.68421	1.23793	10.9474	3.37992
16	6.94737	1.78767	5.73684	2.03886
16.5	6.21053	2.4454	7.89474	2.22676
17	8.36842	2.65701	6	2.13437
17.5	6.63158	1.84836	4.10526	1.43453
18	7.26316	3.72744	2.84211	1.49905
18.5	6	2.17643	2.10526	0.970003
19	5.57895	1.48937	4.31579	1.66325
19.5	5.36842	1.35122	5.31579	2.16302
20	4.63158	2.02501	2.63158	1.06021
20.5	2.73684	1.01694	4.89474	1.87145
21	2.89474	1.18197	4.57895	1.68467
21.5	4.57895	2.2869	6.73684	2.23455
22	1.31579	0.513289	3.57895	1.09308
22.5	4.42105	2.10168	4.68421	2.00446
23	5.26316	2.88558	6.73684	2.84784
23.5	4.10526	1.32871	8.26316	3.30854
Figure 1D
Baseline	Rebound
1203	1101
963	800.6
988.6	922.2
1343.8	1149.2
790	730.8
695	610.2
840.6	814.4
1181.6	927.8
512.2	558.8
616.8	893.6
522.6	740
920.6	963.4
922.6	673
968.6	886.6
467.6	477.6
237.2	263.4
856.4	732.6
1437.4	1187.8
628.6	750.8
761.6	1091
1193.8	1053.6
494.4	395.8
974.4	1068.6
700.2	527.8
1269	968.8
940.2	862.6
872.2	800.4
840.8	639.4
459.8	433.2
542	517.2
903.4	966.2
Figure 1E
	Day 1				Day 2			Day 3			Day 4				Day 5			Day 6				Day 7
	2.5	9.5	16.5	23.5	6.5	13.5	20.5	3.5	10.5	17.5	0.5	7.5	14.5	21.5	4.5	11.5	18.5	1.5	8.5	15.5	22.5	5.5	12.5	19.5
Average sleep	88.9333	51.0345	24.6	118.367	85.6522	43.3214	41.4483	85.8333	56.7083	37.1724	134.6	70.5417	44.2222	85.4815	77.6923	52.25	28.3462	133.13	63.8	35.9524	128	79.8667	34.8	44.5
standard deviation	11.5785	8.20796	7.92894	10.4289	9.48821	9.44996	7.1329	12.2117	9.48788	6.86697	11.547	8.02374	9.05764	10.0939	16.6996	12.5763	7.87595	13.7337	8.94386	7.76392	11.0561	13.5055	16.1142	7.92116
Standard error	63.4181	44.2012	43.4286	57.1215	45.5039	50.0045	38.4119	59.8249	46.4809	36.9798	63.2453	39.3081	47.0649	52.4495	60.2113	56.2428	40.1596	65.8644	39.9982	35.5788	50.6656	52.3066	62.4102	35.4245
[truncated: 335 more columns]
