# Supplementary material for: Circadian programming of the ellipsoid body sleep homeostat in Drosophila
Source: eLife. 2022 Jun 23;11:e74327. doi: 10.7554/eLife.74327 (PMC9270026; doi:10.7554/eLife.74327)
Supplement: Figure 2—figure supplement 1—source data 1. [file elife-74327-fig2-figsupp1-data1.xlsx]

## Sheet: Supplemental figure 2
Figure 2 supplement to figure 1A
ZT1.5							ZT9.5				Omitted values represent flies that were not sleep deprived >90% of baseline sleep (see methods)
	Sleep lost	Baseline sleep	Sleep gain					Sleep lost	Baseline sleep	Sleep gain
	64	114	115					78	113	-77
	91	205	64					92	204	-24
	74	138	128					65	128	87
	40	0	115					15	34	62
	58	18	183					31	101	13
	33	79	182					54	122	41
	69	117	80					62	119	63
	33	108	94					105	92	45
	59	87	114
	60	18	151					15	68	74
	41	18	126
	56	46	97					52	78	-11
	71	127	63
	60	62	152					70	105	14
	51	163	-60					95	155	-86
	62	42	101					74	124	-39
	58	33	183					35	37	151
	63	26	140					7	91	11
Average sleep	57.9444	77.8333	112.667				Average sleep	56.6667	104.733	21.6
standard deviation	14.6266	58.0783	57.0531				standard deviation	30.6843	42.9975	63.4686
Standard error	3.44753	13.6892	13.4476				Standard error	7.92264	11.1019	16.3875
Figure 2 supplement to figure 1B
Sleep during rebound
	30	60	90	120	150	180	210	240	270
ZT0		23		17.0444		16.5333		17.7778
ZT0.5	19.9778		19.0444		10.8444		8.82222		9.95556
ZT1		17.1778		16.5333		11.2222		8.17778
ZT1.5	21.1556		14.2889		14.2667		8.46667		7.75556
ZT2		17.0222		13.7111		15.1556		8.88889
ZT2.5	24.4889		14.8222		10.2		14.3333		9.24444
ZT3		27.0444		12.7333		10.6889		13.1111
ZT3.5	25.1556		24.8444		10.0667		10.4		11.7556
ZT4		22.9556		23.1778		8.95556		9.51111
ZT4.5	23.7111		18.4889		20.2		8.84444		6.53333
ZT5		20.6667		13.3333		15.1556		4.66667
ZT5.5	17.4889		13.4		8.08889		10.0667		3.71111
ZT6		8.66667		8.55556		4.44444		8.42222
ZT6.5	15.1778		3.33333		3.84444		2.2		3.68889
ZT7		5.57778		5.22222		3.37778		1.97778
ZT7.5	5.75556		2.13333		2.55556		2.68889		2.71111
ZT8		3.44444		1.33333		3.33333		3.68889
ZT8.5	6.77778		3		1.4		3.44444		3.24444
ZT9		4.08889		2.4		2.2		5.35556
ZT9.5	8.57778		5.44444		4.04444		2.75556		5.35556
ZT10		6.33333		5.28889		5.88889		3.84444
ZT10.5	12.7333		6.02222		7.02222		6.15556		3.8
ZT11		7.8		4.02222		8.35556		6.22222
ZT11.5	18.9778		6.68889		4.95556		7.97778		4.8
ZT12		21.6444		19.8444		17.0222		21.4444
ZT12.5	25.9111		28.1111		23.2889		22.4889		26.2
ZT13		26.3778		26.6444		24.3333		23.9778
ZT13.5	28.1778		26.9556		26.9111		25.6667		22.3111
ZT14		28.0667		27.5556		28		26.8222
ZT14.5	27.9778		28.2		26.9778		27.0889		24.8444
ZT15		28.5556		27.6667		27.1778		27.5111
ZT15.5	28.0889		27.9111		27.0667		27.0222		27.3778
ZT16		28.6444		27.8		26.6889		26.9778
ZT16.5	26.8444		28		27.4889		27.1333		26.2444
ZT17		26.8889		27.0889		27.9556		25.4444
ZT17.5	28.9333		27.2222		28.6222		27.3556		26.6889
ZT18		29.4889		28.6222		28.4444		27.4889
ZT18.5	28.9556		29.3333		29.0222		27.9778		28.1778
ZT19		28.9333		29.5111		28.8667		27.6222
ZT19.5	29.0667		28.7111		28.1333		28.1778		27.9556
ZT20		28.7778		29.2667		29.4444		27.8889
ZT20.5	28.6		28.1556		28.9333		28.9111		27.3778
ZT21		28.9111		27.6444		29.0667		28.3556
ZT21.5	29.1556		28.4		28.1778		28.7111		27.8222
ZT22		29.4667		28.8889		28.1333		27.8444
ZT22.5	29.0889		29.5778		28.7333		28.6		27.3333
ZT23		28.9556		29.2667		29.0444		28.0222
ZT23.5	28.0222		28.1333		28.3333		27.7778		26.6444
Baseline
ZT0	ZT0.5	ZT1	ZT1.5	ZT2	ZT2.5	ZT3	ZT3.5	ZT4	ZT4.5	ZT5	ZT5.5	ZT6	ZT6.5	ZT7	ZT7.5	ZT8	ZT8.5	ZT9	ZT9.5	ZT10	ZT10.5	ZT11	ZT11.5	ZT12	ZT12.5	ZT13	ZT13.5	ZT14	ZT14.5	ZT15	ZT15.5	ZT16	ZT16.5	ZT17	ZT17.5	ZT18	ZT18.5	ZT19	ZT19.5	ZT20	ZT20.5	ZT21	ZT21.5	ZT22	ZT22.5	ZT23	ZT23.5
4.44444	0.488889	2.17778	2.04444	2.24444	2.86667	3.62222	3.84444	2.71111	3.46667	5.46667	1.8	1.17778	0.377778	0.666667	1.37778	0.555556	1.64444	3.04444	1.93333	2.04444	2.95556	3.11111	3.06667	20.2444	26	24.6444	24.2444	23.4222	25.8444	24.4667	25.0222	25.5111	26.3556	27.4889	25.3778	27.1556	28.5333	27.1111	26.2444	24.8	25.7111	23.8	21.8667	22.1778	21.5333	20.9778	14.5333
Figure 2 supplement to figure 1C
ZT1.5							ZT9.5				Omitted values represent flies that were not sleep deprived >90% of baseline sleep (see methods)
	Sleep lost	Baseline sleep	Sleep gain					Sleep lost	Baseline sleep	Sleep gain
	58	0	174
	70	0	148
	63	25	118
	65	137	29					115	12	19
	0	0	134
	42	10	40
	58	0	113
	0	0	40
								0	5	11
	28	0	86
	55	0	42					0	22	-11
								11	0	63
	67	38	68					26	5	92
	64	23	112					18	17	47
								42	16	37
	49	83	-33					43	14	-3
								6	5	42
	43	24	174					24	11	37
								62	37	8
Average	47.2857	24.2857	88.9286				Average	31.5455	13.0909	31.0909
Standard error	23.0832	39.8795	60.6674				Standard error	33.8655	10.2416	30.3099
Standard deviation	6.16925	10.6582	16.214				Standard deviation	10.2108	3.08797	9.13878
Figure 2 supplement to figure 1D
	Baseline		Rebound
	ZT1.5	ZT9.5	ZT1.5	ZT9.5
	184	180	22	70
	258	160	1	161
	0	53	1	1
	270	239	8	191
	118	164	2	15
	0	158	0	11
	80	168	0	3
	58	160	3	3
	52	57	1	0
	7	18	0	1
	91	40	2	5
	36	63	0	0
	0	9	1	2
	213	163	2	2
	247	194	2	6
	130	169	1	1
	76	85	0	0
	173	166	0	0
	0	0	0	0
	0	0	0	0
	30	162	0	2
	1	60	0	1
	87	5	0	0
	63	165	0	0
	111	161	0	0
	171	222	2	1
	39	0	0	183
	51	161	0	0
	74	46	0	4
	210	28	0	1
	53	0	0	0
	80	166	1	0
	102	170	0	11
	38	21	0	1
	142	169	0	1
	59	237	0	237
	270	236	7	3
	209	243	11	136
	144	0	0	1
	0	15	0	0
	162	0	0	2
	136	173	0	160
	16	43	0	0
	7	0	0	0
	270	161	5	160
	144	166	73	2
	9	14	7	0
	152	270	43	0
	62	68	0	0
	220	126	0	0
	39	163	17	28
	86	0	0	0
	127	1	0	0
	106	163	0	0
	65	1	0	0
	184	0	23	3
Figure 2 supplement to figure 1E
	Baseline		Rebound
	ZT1.5	ZT8.5	ZT1.5	ZT8.5
	20	12	0	4
	5	26	0	0
	2	12	0	4
	19	0	0	0
	84	6	0	0
	0	0	0	0
	0	0	0	0
	7	0	0	0
	7	0	0	0
	5	0	0	0
	0	9	0	0
	8	5	0	0
	13	12	0	0
	21	0	0	1
	0	12	5	0
	0	3	0	0
	33	39	2	9
	1	7	0	0
	0	0	0	0
	12	0	0	0
	0	13	4	0
	10	0	0	1
	24	8	2	3
	47	0	2	3
	2	15	3	0
	69	0	16	1
	13	0	3	3
	19	0	4	1
	23	0	5	0
	0	0	1	6
	0	4	3	0
	29	34	3	4
	22	14	0	0
	0	0	1	0
Figure 2 supplement to figure 1F
	Baseline		Rebound
	ZT1.5	ZT7.5	ZT1.5	ZT7.5
	270	270	269	1
	253	185	269	0
	270	270	269	3
	80	259	200	24
	270	270	269	6
	81	246	4	3
	31	18	169	44
	270	270	6	0
	270	270	142	6
	105	270	154	0
	39	68	3	98
	179	270	51	8
	0	6	10	0
	214	58	155	1
	25	16	108	0
	88	52	5	15
	64	232	17	5
	10	17	0	3
	10	113	59	0
	191	36	0	16
	108	247	46	4
	270	116	13	0
	270	270	1	1
	36	39	73	1
	270	270	8	3
	145	215	1	0
	270	182	13	0
	270	270	91	1
	29	109	2	0
	67	100	204	0
	24	104	72	1
	131	270	1	1
	270	103	229	7
	270	96	3	1
	38	270	1	0
	29	9	269	3
	75	137	20	0
	80	9	68	0
	26	113	22	6
	4	74	259	10
	97	75	52	0
	119	179	3	0
	6	18	217	0
	113	107	3	0
	124	99	35	0
	106	125	269	0
	125	221	66	0
	27	189	1	1
	56	93	159	0
	172	142	170	0
	98	117	74	0
	3	270	36	0
	120	270	15	1
	72	70	4	0
