# Supplementary material for: Circadian programming of the ellipsoid body sleep homeostat in Drosophila
Source: eLife. 2022 Jun 23;11:e74327. doi: 10.7554/eLife.74327 (PMC9270026; doi:10.7554/eLife.74327)
Supplement: Figure 2—source data 1. [file elife-74327-fig2-data1.xlsx]

## Sheet: Figure 2
Figure 2A
Sleep during rebound
	30	60	90	120	150	180	210	240	270
ZT0		21.2857		21.25		19.5714		10.5
ZT0.5	24.2857		21.0714		19.8571		18.3214		6.85714
ZT1		22.9643		16.3929		20.5		19.1071
ZT1.5	26.4643		23.8214		15.6429		21		17.3571
ZT2		25.6429		21.7857		19.4643		20.7143
ZT2.5	22.2143		26.8214		23.3929		19.6786		21.5357
ZT3		25.8929		24.9286		22.6786		22.9643
ZT3.5	26.6429		25.1429		20.5714		22.4286		18.6071
ZT4		27.7857		23.0357		22.1071		21.25
ZT4.5	26.6429		28.7143		23.9643		23.1786		20.3214
ZT5		28		23.4643		23		23.6786
ZT5.5	27.6071		28.0357		22.6071		21.9286		23
ZT6		26.9286		25.4286		22.5714		17.75
ZT6.5	26.0357		27.0714		24.1071		24.2143		17.8929
ZT7		28.4643		24.9643		24.6429		20.4643
ZT7.5	25.3571		27.0714		20.1071		21.3571		13.3214
ZT8		27.3571		21.6429		15.6429		17.4643
ZT8.5	23.3571		24.3571		18.6071		13.2857		8.57143
ZT9		19.3929		17.8214		14.1071		9.82143
ZT9.5	22.5		16.25		9.67857		8.71429		9.96429
ZT10		18.8929		6.35714		5.64286		6.03571
ZT10.5	14.6429		9.25		4.39286		3.17857		2.67857
ZT11		6.03571		1.89286		2.82143		0.857143
ZT11.5	8.10714		1.10714		0.607143		2.39286		1.39286
ZT12		17.7143		17.7857		12.0714		17.1786
ZT12.5	24.7857		26.3929		25.8929		24.2857		21.5
ZT13		24.8571		27.1429		26.9286		25.3929
ZT13.5	26.3571		25.3214		27.0357		28.7143		23.8929
ZT14		28.3214		24.7857		28.2143		29.0357
ZT14.5	28.1786		29		25.4286		27.4643		27.3214
ZT15		28.75		29.2143		26.2143		27.4643
ZT15.5	27.9286		29.25		28.4286		26.8214		27.8929
ZT16		28.5		29.5357		28.5		26.9643
ZT16.5	26.1071		27.6429		29.5		28.5714		28.1786
ZT17		28.2143		28.0714		29.3571		28.5714
ZT17.5	27.6786		27.7143		27.9643		28.75		28.1071
ZT18		29.2857		28.5714		28.2143		28.6071
ZT18.5	27		29.4643		28.6786		28.6786		28.1429
ZT19		28.5714		29.3929		27.7143		28.3929
ZT19.5	28.9286		29		29.7143		27.6786		28.9643
ZT20		29.0714		29.0357		29.3571		26.75
ZT20.5	27.0714		28.8214		29.3929		29.4643		27.6786
ZT21		29.7857		28.8571		27.9643		28
ZT21.5	28.4286		29.4286		28.3929		28.25		27.3571
ZT22		29.6429		28.6071		28.6786		27.8571
ZT22.5	28.25		29.5714		29.5714		29.1429		27.25
ZT23		29.4643		28.9643		28.8929		27.6071
ZT23.5	25.6071		28.5714		29.3929		28.0714		27.9643
Baseline
	ZT0	ZT0.5	ZT1	ZT1.5	ZT2	ZT2.5	ZT3	ZT3.5	ZT4	ZT4.5	ZT5	ZT5.5	ZT6	ZT6.5	ZT7	ZT7.5	ZT8	ZT8.5	ZT9	ZT9.5	ZT10	ZT10.5	ZT11	ZT11.5	ZT12	ZT12.5	ZT13	ZT13.5	ZT14	ZT14.5	ZT15	ZT15.5	ZT16	ZT16.5	ZT17	ZT17.5	ZT18	ZT18.5	ZT19	ZT19.5	ZT20	ZT20.5	ZT21	ZT21.5	ZT22	ZT22.5	ZT23	ZT23.5
	3.375	1.40625	1.0625	4.59375	6.25	7.46875	9.09375	10.875	13.0312	14.625	15.8125	16.3125	14.6875	15.1562	10.5625	13.0312	13.5625	9	5.46875	1.90625	1.9375	1.0625	1.53125	0.0001	12.6562	21.2812	22.8125	23.875	23.0625	25	23.4062	23.8438	24.3438	25.5625	22.9062	22.9375	23.9375	23.9375	25.25	25.8125	25.1875	25.9062	25.6562	25.3125	27.0625	25.25	23.75	23.7188
Figure 2D
Sleep during rebound
	30	60	90	120	150	180	210	240	270
ZT0		13.25		15.525		12.675		8.575
ZT0.5	21.125		21.9		21.175		19.3		14.05
ZT1		24.8		21.275		22.125		21.85
ZT1.5	25.475		24.8		22.475		21.8		21.225
ZT2		26.85		25.15		20.55		24
ZT2.5	17.2		25.25		23.3		18.975		22.975
ZT3		26.525		23.45		24.025		20.45
ZT3.5	25.575		27.825		22.9		25.1		21.375
ZT4		23.15		23.75		25.475		23.925
ZT4.5	25.425		24.5		21.25		25.425		23.625
ZT5		26.95		22.35		21.5		26.275
ZT5.5	26.725		25.275		23.075		22.95		23.05
ZT6		27.1		24.575		22.425		22.65
ZT6.5	24.95		25.125		26.025		23.15		18.625
ZT7		26.375		24.75		25.175		23.3
ZT7.5	25.625		25.225		26.7		24.775		22.475
ZT8		25.4		23.35		25.325		25.85
ZT8.5	27.325		24.9		21.25		24.325		24.1
ZT9		26.175		22.8		21.675		24.875
ZT9.5	22.125		25.575		23.525		22.125		22.075
ZT10		25.3		23.75		25.2		20.8
ZT10.5	26.15		23.975		25.75		24.7		21.05
ZT11		26.025		21.55		25.25		23.575
ZT11.5	25.675		24		20.25		24.575		23.375
ZT12		26.025		22.175		19.3		21.625
ZT12.5	25.825		25.8		24.475		20.5		21.525
ZT13		27.15		24.025		24.625		21.325
ZT13.5	26.05		25.725		26.075		25.525		21.275
ZT14		27.5		24.625		25.5		23.975
ZT14.5	27.25		26.8		25.425		25.25		21.475
ZT15		28.225		26.65		25.35		25.65
ZT15.5	27.55		27.175		26.45		25.65		24.15
ZT16		27.3		28.075		24.975		24.725
ZT16.5	23.975		28.475		27.375		23.5		22.375
ZT17		27.225		27.75		27.225		24.1
ZT17.5	27.575		27.125		26.775		26.1		19.675
ZT18		28.95		25.75		26.775		25.65
ZT18.5	27.775		28.25		25.225		26.6		24.625
ZT19		28.8		27.925		24.9		26.825
ZT19.5	27.85		28.65		26.7		23.6		25.025
ZT20		26.7		28.275		24.05		22.1
ZT20.5	27.3		26.925		27.825		24.425		20.95
ZT21		29.125		26.55		27.275		25.45
ZT21.5	28.275		26.125		26.625		27.15		22.45
ZT22		29.05		24.95		26.05		27.5
ZT22.5	27.65		28.5		25.25		26.375		23.575
ZT23		26.775		28.25		24.375		25.8
ZT23.5	25.55		26.85		27.9		23.825		26.15
Baseline
	ZT0	ZT0.5	ZT1	ZT1.5	ZT2	ZT2.5	ZT3	ZT3.5	ZT4	ZT4.5	ZT5	ZT5.5	ZT6	ZT6.5	ZT7	ZT7.5	ZT8	ZT8.5	ZT9	ZT9.5	ZT10	ZT10.5	ZT11	ZT11.5	ZT12	ZT12.5	ZT13	ZT13.5	ZT14	ZT14.5	ZT15	ZT15.5	ZT16	ZT16.5	ZT17	ZT17.5	ZT18	ZT18.5	ZT19	ZT19.5	ZT20	ZT20.5	ZT21	ZT21.5	ZT22	ZT22.5	ZT23	ZT23.5
	2.825	6.525	10.975	12.95	14.25	14.175	16.6	14.875	16.45	17.8	14.6	15.925	14.65	15.85	13.275	14.975	16.75	16.775	14.8	16.675	15.1	16.275	17.775	15.925	9.275	11.425	14.375	12.275	11.3	12.825	17.925	16.925	14.575	15.625	17.825	16.625	14.35	15.55	13.75	14.6	15.7	17.75	17.575	15.8	16.05	16.5	15.775	14.75
Figure 2B
ZT1.5							ZT9.5
	Sleep lost	Baseline sleep	Sleep gain					Sleep lost	Baseline sleep	Sleep gain	Omitted values represent flies that were not sleep deprived >90% of baseline sleep (see methods)
	32	100	167					108	99	107
	69	43	159					32	134	54
	53	49	220					55	104	41
	72	102	164					77	120	43
	62	80	72
								56	97	57
	90	82	171					60	46	43
	64	126	28					36	133	41
								0	29	77
	31	79	190					43	68	110
	17	43	89					15	7	154
	5	72	189					58	62	-46
	68	156	74					62	108	35
								44	92	71
	65	6	111					20	63	-4
								0	100	8
	7	55	103					0	105	-19
	67	221	40					97	106	102
	53	0	167					32	25	-7
	69	43	226					57	25	44
	56	173	62					8	111	58
								99	105	79
	21	161	57					76	66	83
								105	112	56
	90	196	73					96	141	71
	63	23	198					68	97	68
	62	5	258					53	75	65
								86	113	75
								6	86	-34
	40	115	85
	47	83	159					88	74	48
Average	52.3043	87.5217	133.13				Average	53	86.3103	51.0345
Standard error	4.95571	12.8666	13.7337				Standard error	6.27804	6.46325	8.20796
Standard deviation	23.7667	61.706	65.8644				Standard deviation	33.8083	34.8057	44.2012
Figure 2E
ZT1.5							ZT9.5
	Sleep lost	Baseline sleep	Sleep gain					Sleep lost	Baseline sleep	Sleep gain	Omitted values represent flies that were not sleep deprived >90% of baseline sleep (see methods)
								69	85	176
	39	173	54					75	149	81
								11	65	154
	88	207	53					105	165	101
	61	167	19
	72	102	95
	53	115	144					87	177	73
	6	77	102					12	70	101
	82	195	24					97	185	39
	74	181	47					66	108	62
								101	142	117
	78	190	-83
	65	175	87					100	188	65
	43	118	123					52	162	34
	0	5	176
	39	118	140					63	263	-6
	46	123	100					118	121	149
	23	33	119					0	87	98
	73	187	51
	108	227	14					37	237	21
	63	70	178					61	92	129
	40	170	100					76	116	145
	45	177	74
	32	79	108					90	96	53
	76	156	96					88	163	107
Average	54.8182	138.409	82.7727				Average	68.8421	140.579	89.4211
Standard error	26.561	58.7875	59.1479				Standard error	33.7248	55.0316	49.2717
Standard deviation	5.66283	12.5335	12.6104				Standard deviation	7.737	12.6251	11.3037
Figure 2C
ZT2.5							ZT10.5
	Control during SD	Control during rebound	Sleep during rebound					Control during SD	Control during rebound	Sleep during rebound
	62	191	266					35	46	62
	75	44	134					39	46	123
	30	142	100					20	34	37
	119	23	235					9	84	95
	18	25	205					25	69	146
	63	240	108					87	147	107
	83	161	208					62	108	20
	19	0	151					0	0	114
	89	222	198					93	138	110
	47	44	128					0	28	102
	27	66	101					22	18	70
	0	27	262					0	0	24
	43	87	242					29	30	182
	61	165	222					112	127	72
	41	125	263					38	59	35
	91	201	270					84	169	159
	32	78	268					27	25	248
	115	235	174					93	188	63
	0	0	254					0	0	34
	28	99	159					0	57	92
	11	97	207					18	89	171
	0	65	111					0	36	0
	89	64	264					21	63	96
	51	96	182					0	17	39
	13	30	258					33	131	223
			205							164
			270							132
										0
			246
			261							38
			195							26
			232							266
			239							38
			138							54
			173							85
			263							69
			117							38
			190							76
			85							62
			237							245
			253							166
			257							152
			161							90
			243							88
			247							113
			166							12
			263							107
			254							42
			165							115
			246							83
			173							2
			238
Average	48.28	101.08	205.627				Average	33.88	68.36	95.8627
Standard error	35.376	74.696	55.4123				Standard error	34.6522	55.0484	66.2727
Standard deviation	7.0752	14.9392	7.6843				Standard deviation	6.93044	11.0097	9.28003
Figure 2F
ZT2.5							ZT10.5
	Control during SD	Control during rebound	Sleep during rebound					Control during SD	Control during rebound	Sleep during rebound
	74	157	203					37	134	117
	51	100	170					66	151	250
	63	115	268					71	94	268
	46	146	270					98	148	269
	12	93	122					72	74	180
	142	210	259					65	141	232
	96	160	198					83	175	260
	108	89	263					44	73	268
	58	57	173					29	47	129
	116	112	242					45	46	215
	36	19	238					0	48	244
	14	53	129					11	45	174
	106	159	270					148	178	188
	117	224	260					107	155	266
	0	0	269					57	84	255
	38	84	174					67	96	246
	101	209	270					88	153	250
	81	124	18					64	86	35
	48	82	239					46	202	242
	115	127	212					82	111	210
	115	128	247					101	178	263
	6	93	224					20	45	160
	76	119	94					53	87	225
	64	128						52	139
Average	70.125	116.167	214.455				Average	62.75	112.083	214.591
Standard error	40.3434	55.3846	66.9606				Standard error	32.9522	49.5492	59.7415
Standard deviation	8.23507	11.3053	13.9623				Standard deviation	6.72634	10.1142	12.457
