# Supplementary material for: Circadian programming of the ellipsoid body sleep homeostat in Drosophila
Source: eLife. 2022 Jun 23;11:e74327. doi: 10.7554/eLife.74327 (PMC9270026; doi:10.7554/eLife.74327)
Supplement: Figure 3—figure supplement 1—source data 1. [file elife-74327-fig3-figsupp1-data1.xlsx]

## Sheet: Sheet1
Figure 3 supplement to figure 1A
Sleep during rebound
	30	60	90	120	150	180	210	240	270
ZT0		5.7037		4.25926		2.40741		2.14815
ZT0.5	7.81481		8.66667		5		3.11111		2.11111
ZT1		8.48148		5.33333		6.62963		6.18519
ZT1.5	10.2222		9.11111		6.44444		8.40741		6.48148
ZT2		9.92593		12.037		9.25926		9.62963
ZT2.5	12.4815		11.3704		13.8889		14.1852		11.2593
ZT3		16.037		15.1852		13.8519		10.7778
ZT3.5	19.2963		16.7778		15.8148		16.7407		11.1111
ZT4		21.6667		18.037		18.3704		15.3704
ZT4.5	19.8519		21.037		21.9259		16.2222		18.037
ZT5		20.963		22.2963		20.7778		17.1852
ZT5.5	21.1111		24.0741		19.8148		20.1852		20.3333
ZT6		19.5926		21.2963		17.1481		17.8148
ZT6.5	23.8889		20.7778		22.6667		15.7778		15.963
ZT7		23.7037		16.9259		20		13.9259
ZT7.5	20.6667		21.1481		19.6667		14.5556		11.8519
ZT8		19.5185		17.2593		14.2593		13.8889
ZT8.5	14.9259		16.2593		9.44444		10.0741		5.51852
ZT9		9.22222		7.44444		5		6.59259
ZT9.5	16.4074		4.55556		2.96296		2.81481		4.03704
ZT10		9.33333		3.22222		1.85185		2.22222
ZT10.5	7.25926		2.44444		1.88889		1.74074		2.51852
ZT11		1.07407		0		0.555556		0.740741
ZT11.5	3.07407		0.037037		0		1		0.518519
ZT12		5.85185		4.7037		2.7037		4.55556
ZT12.5	10.8889		7.03704		9.92593		7.37037		5.96296
ZT13		13.3704		11.8889		15.5926		12.8148
ZT13.5	14.3704		14.4074		15.037		15.4815		10.963
ZT14		18.1852		16.5556		15.1111		17.3333
ZT14.5	18.0741		18.4444		17.2222		17.963		16.7778
ZT15		23.3704		21.8889		20.2963		17.8889
ZT15.5	19.4444		22.9259		19.7778		19.3333		16.7778
ZT16		21.4074		23.4074		19.037		16.4444
ZT16.5	20.4444		21.963		21.2963		16.8519		18.7037
ZT17		21.9259		22.6296		23.6667		18.1852
ZT17.5	21		21.1481		21.5185		21.8889		14.5556
ZT18		23		22.4074		21.6296		19.037
ZT18.5	22.4444		23.6296		23.2963		22.5926		20.037
ZT19		22.4815		25.1481		22.2222		20.8519
ZT19.5	21.5185		23.8148		23.1481		19.5926		17.8519
ZT20		22.5556		21.8519		20.7407		19.5556
ZT20.5	21.8148		24.5556		22.1111		23.0741		20.3333
ZT21		24.037		22.6296		20.5926		25.5926
ZT21.5	23.1852		22.4074		24.2593		23.1111		21.2593
ZT22		26.1481		22.3704		22.4074		22.5926
ZT22.5	22.7407		24.5185		21.1852		21		16.2593
ZT23		23.1852		22.037		18		18.1481
ZT23.5	18.7407		22.3333		17		13.037		14.7778
Baseline
	ZT0	ZT0.5	ZT1	ZT1.5	ZT2	ZT2.5	ZT3	ZT3.5	ZT4	ZT4.5	ZT5	ZT5.5	ZT6	ZT6.5	ZT7	ZT7.5	ZT8	ZT8.5	ZT9	ZT9.5	ZT10	ZT10.5	ZT11	ZT11.5	ZT12	ZT12.5	ZT13	ZT13.5	ZT14	ZT14.5	ZT15	ZT15.5	ZT16	ZT16.5	ZT17	ZT17.5	ZT18	ZT18.5	ZT19	ZT19.5	ZT20	ZT20.5	ZT21	ZT21.5	ZT22	ZT22.5	ZT23	ZT23.5
	0.481481	0	0.296296	0.185185	0.37037	0.888889	1.48148	5	5.40741	9.96296	10.7037	10.4444	10.7778	10.2222	10.2222	9.81481	6.22222	5.07407	4.11111	2.55556	2	0.518519	0	0.222222	2.59259	6.85185	8.77778	10.9259	16.3333	18.7407	19.4444	19.5556	15.5556	15.6667	18.0741	20.4074	21.3704	21.7037	20.2593	19.8889	17.4444	17.2963	15.5185	14.0741	15.7407	15.1111	13.6667	12.963
Figure 3 supplement to figure 1B
Sleep during rebound
	30	60	90	120	150	180	210	240	270
ZT0		14.4167		11.3333		13.1667		6.33333
ZT0.5	14.0833		16.6667		11.8333		10		7
ZT1		13.8333		18.1667		17		12.1667
ZT1.5	17.1667		15.8333		16.8333		18.5		12.5833
ZT2		17.4167		14.75		14.9167		13.0833
ZT2.5	17.4167		16.75		16.75		15.75		17.3333
ZT3		19.4167		18.1667		14.8333		13.9167
ZT3.5	21.9167		20.0833		19.6667		19.4167		10.0833
ZT4		26.8333		22.4167		14.4167		12.8333
ZT4.5	26.1667		28		19.6667		20.4167		13.3333
ZT5		27.1667		24.5833		23.4167		16.5
ZT5.5	24.5833		27.8333		25		25		18.25
ZT6		25.4167		23.0833		23.9167		21.25
ZT6.5	21.8333		25.75		24.5		23.4167		19.5833
ZT7		26.4167		24.5		23.9167		21
ZT7.5	21.75		26.3333		23.8333		20.8333		18.0833
ZT8		25.4167		23.5833		21.6667		22.4167
ZT8.5	27.1667		26.75		24.9167		22.9167		20.1667
ZT9		25.75		25.5833		20.8333		23.8333
ZT9.5	28		26.6667		21.6667		19.75		22
ZT10		27.5833		22.5833		25		19.25
ZT10.5	24.6667		24.8333		20.8333		22.25		15.5833
ZT11		24		23.6667		22.9167		17.1667
ZT11.5	21.75		24.75		23.8333		16.5833		18.8333
ZT12		12.5833		14.3333		13.25		12.1667
ZT12.5	20.25		17.4167		16.4167		15.25		10.6667
ZT13		25.4167		17.5		15.9167		21.5
ZT13.5	25.8333		24.1667		20.8333		17.3333		21.6667
ZT14		26.0833		24.1667		19.5		19.5833
ZT14.5	27.8333		25.5		23.8333		18.0833		17.9167
ZT15		27.1667		24.0833		23.75		18.0833
ZT15.5	28.5833		25.1667		26.6667		16.25		15.9167
ZT16		29.9167		22.4167		24.75		17.5
ZT16.5	26.4167		28.8333		25.25		22.3333		17.9167
ZT17		28		25.1667		24.3333		19.9167
ZT17.5	29.9167		25.0833		21.5		22.6667		17.8333
ZT18		30		27.4167		20.25		19.9167
ZT18.5	24.9167		29.4167		25.4167		19.0833		19.9167
ZT19		26.4167		24.5833		24		14.25
ZT19.5	28.75		27.3333		21.75		23.9167		12.75
ZT20		29		25.5833		19.0833		19.3333
ZT20.5	27.6667		23.5833		24.75		24.75		19.9167
ZT21		27.3333		20.4167		21.75		21.9167
ZT21.5	25.8333		28.4167		19.5833		19		17.25
ZT22		29.0833		28.0833		22.25		14.5833
ZT22.5	28		29.0833		25.25		18.6667		17.75
ZT23		29.1667		27.3333		22.1667		21
ZT23.5	25.0833		27.6667		21.9167		24.0833		25.8333
Baseline
	ZT0	ZT0.5	ZT1	ZT1.5	ZT2	ZT2.5	ZT3	ZT3.5	ZT4	ZT4.5	ZT5	ZT5.5	ZT6	ZT6.5	ZT7	ZT7.5	ZT8	ZT8.5	ZT9	ZT9.5	ZT10	ZT10.5	ZT11	ZT11.5	ZT12	ZT12.5	ZT13	ZT13.5	ZT14	ZT14.5	ZT15	ZT15.5	ZT16	ZT16.5	ZT17	ZT17.5	ZT18	ZT18.5	ZT19	ZT19.5	ZT20	ZT20.5	ZT21	ZT21.5	ZT22	ZT22.5	ZT23	ZT23.5
	0.833333	0	1.66667	3.5	3.16667	4.5	5.16667	8.16667	6.16667	10.25	12.9167	14.0833	14.8333	18	19.9167	20.5	18	14.3333	15.25	14.6667	9.08333	7.91667	7.08333	7	1	8.66667	12.75	18.0833	15.5	14	15.1667	14.5	16.25	15.6667	15.9167	20.9167	19.75	14.3333	19.8333	14.5833	14.75	13.6667	16.6667	20.9167	13.9167	16.3333	11.9167	12.1667
Figure 3 supplement to figure 1C
Sleep during rebound
	30	60	90	120	150	180	210	240	270
ZT0		11		19.4286		15.0286		12.2857
ZT0.5	10.8857		13.2286		17.4571		13.1714		9.37143
ZT1		16.0286		14.0857		18.2286		15.0286
ZT1.5	20.9143		17.5143		15.9714		18.3429		18.2286
ZT2		21.1143		18.6		19.5429		20.7714
ZT2.5	16.0286		20.2857		19.6286		18.3714		19.9143
ZT3		23.8		21.1143		18.9143		18.0571
ZT3.5	18.3714		23.8		23.4571		18.6286		17.3429
ZT4		22.7714		23.3429		22.7429		18.8286
ZT4.5	22.1714		22.6286		23.1714		22.8		19.1429
ZT5		24.4571		22.7429		21.0571		22.1143
ZT5.5	24.8		24.2857		23.0571		20.2857		22.6286
ZT6		25.5143		23.7429		22		20.4571
ZT6.5	21.9429		23.9714		22.0286		19.1429		16.8571
ZT7		22.6571		25.7714		20.2857		14.9143
ZT7.5	18.5429		19.6857		22.8571		18.9714		11.3143
ZT8		15.5143		14.2571		18.2857		14.8286
ZT8.5	15.5714		12.1143		10.3714		14.5429		10.2857
ZT9		15.2		9.05714		8.34286		10.6286
ZT9.5	8.91429		10.5714		7.68571		5.77143		9.28571
ZT10		6.85714		8.97143		6.2		5.54286
ZT10.5	5.65714		7.02857		6.77143		4.88571		4.62857
ZT11		4.8		3.68571		6.02857		4.82857
ZT11.5	5.74286		5.28571		2.94286		5.8		4.91429
ZT12		12.4571		10.4571		10.5714		12.2286
ZT12.5	23.7143		22.7143		20.7429		21.3714		19.4
ZT13		25.2857		22.9429		23.9143		23.9714
ZT13.5	20.9429		23.7429		22.4571		25.0286		22.1143
ZT14		25.3429		25.2857		25.4571		23.6571
ZT14.5	26.3429		24.3429		25.3429		22.8857		21.9429
ZT15		26.7714		23.9714		24.6286		22.7429
ZT15.5	26.5429		26.2857		25.4		24.5714		19.3714
ZT16		24.9714		26.9429		22.9143		23.5714
ZT16.5	17.6286		24.2857		25.6		22.8857		23.0571
ZT17		23.4		24.8286		23.0857		22.0857
ZT17.5	23.5143		23.8		23.6		26.3143		19.3429
ZT18		25.0286		25.8571		23.8571		24.4857
ZT18.5	27.2286		25		23.7429		23.5714		23.5143
ZT19		27.9143		25.6857		23.1429		25.4286
ZT19.5	25.5143		26.2571		23.9429		22.7143		24.1143
ZT20		26.7143		27.6		23.4857		21.7143
ZT20.5	23.7714		26.2571		26.0286		24.9429		21.6571
ZT21		26.5429		27.3143		26.5429		25.8286
ZT21.5	25.2571		26.0571		27.8857		25.7714		24.5143
ZT22		26.0857		27.2571		27.4286		25.2857
ZT22.5	26.5714		27.4571		26.0857		26.7143		24
ZT23		27.0857		27.6857		24.5714		26.3714
ZT23.5	19.2		27.8857		27.7143		25.3143		25.7714
Baseline
	ZT0	ZT0.5	ZT1	ZT1.5	ZT2	ZT2.5	ZT3	ZT3.5	ZT4	ZT4.5	ZT5	ZT5.5	ZT6	ZT6.5	ZT7	ZT7.5	ZT8	ZT8.5	ZT9	ZT9.5	ZT10	ZT10.5	ZT11	ZT11.5	ZT12	ZT12.5	ZT13	ZT13.5	ZT14	ZT14.5	ZT15	ZT15.5	ZT16	ZT16.5	ZT17	ZT17.5	ZT18	ZT18.5	ZT19	ZT19.5	ZT20	ZT20.5	ZT21	ZT21.5	ZT22	ZT22.5	ZT23	ZT23.5
	4.6	1.65714	1.28571	3.88571	5.6	6.6	7.05714	8.77143	10.8286	10.7143	12.2	13.1714	13.2286	14	10.8286	7.25714	7.31429	4.91429	3.82857	2.71429	3.31429	2.88571	2.94286	2.14286	4.22857	12.6286	16.9143	16.4571	20	16.8571	18.4857	18.8857	16.8286	16.7714	20.6857	19.2571	18.0857	18.2571	20.4857	22.0571	20.8857	19.2857	21.2	22.3143	19.2571	20	20.6857	17.8
Figure 3 supplement to figure 1D
Sleep during rebound
	30	60	90	120	150	180	210	240	270
ZT0		14.5263		13.7895		12.1053		6.94737
ZT0.5	14.3158		17.2105		13.6842		13.0526		6.78947
ZT1		17.5263		18.1579		17.0526		15.4211
ZT1.5	17		18.4737		17.1053		18.0526		14
ZT2		18.2632		16.7895		15		14
ZT2.5	20.5263		17.5263		16.2105		14.9474		15.6842
ZT3		20.7895		17.8421		14.6316		12.6842
ZT3.5	22.3158		20.8947		18.8421		19		11.7895
ZT4		26.4737		23.0526		16.1053		15.3684
ZT4.5	25.4737		27.4737		21.5789		19.7368		15.2632
ZT5		27.8947		24.5789		23.7895		17.4737
ZT5.5	24.6842		28.3684		25.1053		24.9474		19.1053
ZT6		26.1579		24.5263		24		19.3158
ZT6.5	23.5263		26.7368		24.2105		23.6316		17.2105
ZT7		26.7368		26.1053		25.2105		21.5789
ZT7.5	22.3158		27.4211		24.8947		22.4211		19.6316
ZT8		25.8947		25.6316		23.3684		23.5263
ZT8.5	27.3158		27.2632		25.3684		23.8421		17.1053
ZT9		26.2632		26.7895		22.0526		23.5263
ZT9.5	27.5263		26.0526		22.6316		21.1053		22.4737
ZT10		27.4737		23.1579		24.5789		21.3684
ZT10.5	25.4211		26.5789		22.0526		22.8421		18
ZT11		25.2105		24.8421		22.1579		17.8947
ZT11.5	23.5263		25.5263		22.6842		18		17.1053
ZT12		16.6842		17.1053		16.2105		11.2632
ZT12.5	22.3158		19.8947		20.5263		18.7368		14.7368
ZT13		25.3684		20.3158		17.7895		23.1053
ZT13.5	26.5263		24.8947		22.2632		19.8947		22.2105
ZT14		27.3158		25.4737		21.5789		19.6316
ZT14.5	28		26.4211		26		20.3684		19.6316
ZT15		28		24.5789		24		19.3684
ZT15.5	28.7895		26.3158		26.5789		19.5263		17.1053
ZT16		29.9474		23.8421		25.2105		17.3684
ZT16.5	26.5263		29.2105		26.3684		22.4211		18.1053
ZT17		28.5789		25.6842		24.6842		20.4737
ZT17.5	29.0526		24.4737		23.3684		22.8947		16.7895
ZT18		29.5789		25.0526		22.5789		20.8947
ZT18.5	26.7368		28.0526		24.1053		19.7368		20.7368
ZT19		27.5263		23.6316		24.2632		17.7368
ZT19.5	28.8421		27.2105		21.6316		23.0526		16.1053
ZT20		27.9474		25.3684		18.7368		20.3684
ZT20.5	27.6842		25.4737		24.8421		21.0526		18
ZT21		26.8947		22.2632		24		22.1579
ZT21.5	26.2632		27.6842		22.2105		20.7895		18.3684
ZT22		28.1579		27.3158		23.8421		18.5789
ZT22.5	28.1053		28.8947		25.4211		19.7895		18.4737
ZT23		29.2632		27.3684		24		23.2105
ZT23.5	26.2105		28.2105		23.2105		22.5263		24.4211
Baseline
	ZT0	ZT0.5	ZT1	ZT1.5	ZT2	ZT2.5	ZT3	ZT3.5	ZT4	ZT4.5	ZT5	ZT5.5	ZT6	ZT6.5	ZT7	ZT7.5	ZT8	ZT8.5	ZT9	ZT9.5	ZT10	ZT10.5	ZT11	ZT11.5	ZT12	ZT12.5	ZT13	ZT13.5	ZT14	ZT14.5	ZT15	ZT15.5	ZT16	ZT16.5	ZT17	ZT17.5	ZT18	ZT18.5	ZT19	ZT19.5	ZT20	ZT20.5	ZT21	ZT21.5	ZT22	ZT22.5	ZT23	ZT23.5
	2.42105	0	1.31579	3.42105	3.05263	4.63158	6.31579	7.10526	5.73684	11	13.3684	14.1053	15.3684	18.1579	17.2632	15.8947	15.3684	13	15.1053	13.3684	9.21053	7.94737	7.31579	6.26316	2.10526	12.7368	15.3158	17.9474	16.0526	15.8421	17.2632	15.3158	16.7895	15.5263	15.2105	19.7368	17.4211	13.8421	18.5263	17.1579	16.5789	14.9474	14.4737	20.6842	13.8947	15.4211	14.4737	12
