# Supplementary material for: Circadian programming of the ellipsoid body sleep homeostat in Drosophila
Source: eLife. 2022 Jun 23;11:e74327. doi: 10.7554/eLife.74327 (PMC9270026; doi:10.7554/eLife.74327)
Supplement: Figure 3—source data 1. [file elife-74327-fig3-data1.xlsx]

## Sheet: Figure 3
Figure 3A
ZT1.5							ZT9.5				Omitted values represent flies that were not sleep deprived >90% of baseline sleep (see methods)
	Sleep lost	Baseline sleep	Sleep gain					Sleep lost	Baseline sleep	Sleep gain
	29	21	42					78	60	21
	39	101	91					95	50	76
	55	54	131					57	42	67
	39	59	137					100	78	21
	36	31	94					7	6	11
	48	6	210					41	18	103
	0	11	115					0	19	15
	6	0	111					23	46	56
								81	95	49
	53	120	60					71	89	23
	0	27	60					0	19	15
								137	10	76
								0	0	8
	5	0	58					39	19	16
	6	0	115
	18	5	6					0	20	40
	54	43	59					20	37	42
	0	0	63					30	27	-12
	60	29	97					0	7	11
	36	88	5					12	7	-7
								14	5	24
	47	11	162					0	62	25
	58	74	20
	24	5	238					52	22	46
	51	144	11					50	99	-18
	61	82	36					29	0	25
	36	75	81					0	76	5
								0	61	0
								27	87	62
								31	57	20
								15	38	29
								9	0	0
								14	38	-7
								13	45	30
Average	33.087	42.8696	87.0435				Average	32.6562	38.7188	27.25
Standard error	4.47607	8.91136	12.7434				Standard error	6.22408	5.36552	4.99294
Standard deviation	21.4665	42.7374	61.115				Standard deviation	35.2087	30.352	28.2443
Figure 3B
ZT0.5							ZT9.5				Omitted values represent flies that were not sleep deprived >90% of baseline sleep (see methods)
	Sleep lost	Baseline sleep	Sleep gain					Sleep lost	Baseline sleep	Sleep gain
	23	30	92					9	38	140
	40	61	96					83	34	165
	38	77	183					149	110	100
	34	0	87					129	153	98
	86	94	119					76	132	83
	51	0	85					2	24	189
	107	9	128					123	112	52
	53	0	69					63	66	81
	120	5	77					150	131	84
	58	112	11					81	131	54
	70	118	68					150	56	204
	92	0	236					63	84	185
	67	180	57					84	117	146
	97	14	155					83	161	56
	63	13	215					57	127	124
	91	87	108					65	128	79
	69	4	6					23	5	117
	78	0	101					25	95	159
Average	68.7222	44.6667	105.167				Average	78.6111	94.6667	117.556
Standard error	6.28714	12.8335	14.4573				Standard error	11.0788	11.0531	11.4915
Standard deviation	26.6741	54.448	61.3373				Standard deviation	47.0033	46.8941	48.7542
Figure 3C
ZT1.5							ZT9.5				Omitted values represent flies that were not sleep deprived >90% of baseline sleep (see methods)
	Sleep lost	Baseline sleep	Sleep gain					Sleep lost	Baseline sleep	Sleep gain
								0	59	49
								80	128	7
	57	255	-13					84	86	178
	111	239	20					150	171	9
	58	108	30					12	59	36
								71	123	97
	119	265	-8					149	142	101
	61	24	224					76	21	150
	68	210	59					56	104	58
								150	164	77
	59	70	191					50	81	12
								8	0	29
	86	245	-95					34	44	49
								0	60	18
	54	56	210					15	55	16
	68	91	178					11	105	39
								6	18	26
	66	108	81					51	34	6
	49	5	115					0	65	-21
	21	0	172					0	0	48
	17	75	-65					8	12	53
	45	32	110					4	35	32
	54	56	202					0	77	5
	46	121	146					28	49	81
	50	0	11					5	35	-7
	46	0	204					16	19	39
	36	5	10					0	49	18
	48	10	98					10	28	38
								0	54	2
	46	10	144					0	35	49
	42	73	156					40	31	143
	64	29	200					13	94	8
								6	89	34
	41	28	182					23	41	14
								39	81	20
Average	56.48	84.6	102.48				Average	34.1429	64.2286	43.2286
Standard error	22.8439	88.8393	93.8479				Standard error	43.3446	43.2488	44.3622
Standard deviation	4.56878	17.7679	18.7696				Standard deviation	7.22409	7.20814	7.3937
Figure 3D
ZT1.5							ZT8.5				Omitted values represent flies that were not sleep deprived >90% of baseline sleep (see methods)
	Sleep lost	Baseline sleep	Sleep gain					Sleep lost	Baseline sleep	Sleep gain
								134	163	-58
								6	6	125
	12	140	56
	52	122	147
	56	0	0
	60	46	190					64	68	176
	15	19	61
	29	0	240					5	47	119
	0	102	146					99	29	209
								149	193	45
	64	214	7
								150	124	126
	53	21	181					36	56	183
	61	77	162					88	139	105
	18	27	149					89	93	167
	8	30	168					59	92	157
	31	108	112					112	152	90
	30	109	135					132	180	86
	35	144	116					61	53	202
Average	34.125	72.5312	117				Average	79.2667	93.5667	116.067
Standard error	5.66336	16.6053	19.4547				Standard error	13.6507	16.5274	19.8295
Standard deviation	21.9341	64.3119	75.3479				Standard deviation	51.0762	61.8399	74.1952
