# Supplementary material for: Circadian programming of the ellipsoid body sleep homeostat in Drosophila
Source: eLife. 2022 Jun 23;11:e74327. doi: 10.7554/eLife.74327 (PMC9270026; doi:10.7554/eLife.74327)
Supplement: Figure 4—figure supplement 1—source data 1. [file elife-74327-fig4-figsupp1-data1.xlsx]

## Sheet: Sheet2
Figure 4 supplement to figure 1A
Sleep during rebound
	30	60	90	120	150	180	210	240	270
ZT0		5.40625		5.21053		4		1.71875
ZT0.5	17.0312		7.71875		8.26316		4.625		2.90625
ZT1		13.4375		8.40625		11		11.2812
ZT1.5	22.1053		14.5938		11.2188		15.4737		13.4375
ZT2		22.5263		17.0625		13.6562		19.6842
ZT2.5	27.75		22.8421		15.8125		17.4375		14.8947
ZT3		25.2188		23.4737		17.4375		18.0625
ZT3.5	25.1875		27.25		24.1579		19.375		17.1562
ZT4		26.0625		23.25		24.6842		18.0938
ZT4.5	28		26.5625		21.6875		24.8421		19.2188
ZT5		29.3125		27.4375		22.7812		26.3158
ZT5.5	28.5789		28.7188		25.1562		24.0625		27.3684
ZT6		29.0526		28.5938		25.8125		23.8125
ZT6.5	29.0625		29		28.6875		25.6562		23.6875
ZT7		28.9062		28.9474		27.6562		24.2188
ZT7.5	28.3438		28.9375		28.8947		28.125		23.1562
ZT8		29.7188		28.1562		27.6842		25.5938
ZT8.5	29.2105		26.25		25.125		26.8421		22.125
ZT9		27.5263		24		19.4062		20.9474
ZT9.5	26.5625		19.5263		15.4375		8.625		13.4211
ZT10		17.9062		12.0526		6.8125		6.0625
ZT10.5	15.5625		4.5		4.94737		4.21875		2.71875
ZT11		3.75		0.4375		1.73684		1.65625
ZT11.5	3.03125		1.09375		0		1.73684		1.09375
ZT12		9.46875		6.75		5.375		11.5263
ZT12.5	18.2632		18.0625		18.7188		17.1562		17.2632
ZT13		25.3684		23.875		21.875		21.4688
ZT13.5	23.7812		28.4211		24.25		24.3125		21.6875
ZT14		26.875		26.4737		24.8125		22.4375
ZT14.5	25.9375		27.375		28.5789		24.1875		22.8438
ZT15		28.375		27		27.9474		24.4062
ZT15.5	26		29.0312		25.0938		27.7368		23.2812
ZT16		29.5789		29.1875		25.5938		27
ZT16.5	25.125		28.6316		28.8438		23.8438		28.3684
ZT17		27.5		28.9474		28.75		24.6562
ZT17.5	22		28.3438		28.4737		29.3438		23.3125
ZT18		27.8125		28.4688		26.1053		28.4375
ZT18.5	25.9062		27.9062		26		27.2632		26.375
ZT19		29.9375		29.0625		25.5625		27.3158
ZT19.5	25.3158		29.4375		28.1562		23.7188		27.9474
ZT20		26.1579		28.0625		27.2812		25.5312
ZT20.5	20.4688		27.5263		28.7188		27		24.2188
ZT21		26.5		27.8947		28.6562		26.75
ZT21.5	23.5625		24.7188		26.7895		26.8438		25.75
ZT22		27.3438		24.7188		27.2105		26.7188
ZT22.5	25.3158		28.3438		22.2188		25.6842		24.7188
ZT23		26.3158		28		21.2188		25.3158
ZT23.5	24.25		28.6842		27.3125		22.4375		20.6316
Baseline
	ZT0	ZT0.5	ZT1	ZT1.5	ZT2	ZT2.5	ZT3	ZT3.5	ZT4	ZT4.5	ZT5	ZT5.5	ZT6	ZT6.5	ZT7	ZT7.5	ZT8	ZT8.5	ZT9	ZT9.5	ZT10	ZT10.5	ZT11	ZT11.5	ZT12	ZT12.5	ZT13	ZT13.5	ZT14	ZT14.5	ZT15	ZT15.5	ZT16	ZT16.5	ZT17	ZT17.5	ZT18	ZT18.5	ZT19	ZT19.5	ZT20	ZT20.5	ZT21	ZT21.5	ZT22	ZT22.5	ZT23	ZT23.5
	0.53125	0.59375	0.59375	0.78125	0.875	2.78125	4.96875	10.9375	15.8125	19.2188	21.6562	23.25	25.5625	21.8438	19.75	15.5938	18.0625	9.15625	4.75	2.875	1.84375	1.0625	0.78125	1.125	6.59375	19.1562	22.1875	23.625	22.9688	23.3125	25	22.625	23.625	23.0938	20.625	19.875	22.8438	22.4062	22.1875	23.0312	24.8438	23.5	20.0938	16.5625	16.75	21.7812	24.3438	18.9062
Figure 4 supplement to figure 1B
Sleep during rebound
	30	60	90	120	150	180	210	240	270
ZT0		6.18		9.48148		7.52		2.82
ZT0.5	14.9		8.46		9.55556		5.92		1.34
ZT1		12.78		10.14		13.7407		8.28
ZT1.5	18.7778		13.7		12.24		15.7778		11.82
ZT2		17.8519		12.6		12.82		14.7407
ZT2.5	22.02		17.6667		14.34		13.84		16.8148
ZT3		26.08		17.8519		14.16		15.96
ZT3.5	21.6		24.04		17.2222		14.68		14.36
ZT4		22.06		20.34		17.8889		15.28
ZT4.5	25.72		21.54		17.08		19.1481		13.54
ZT5		24.16		21.74		16.96		19.5185
ZT5.5	22.1852		21.84		20.4		18.94		19.2963
ZT6		22.7778		22.1		19.86		18.68
ZT6.5	24.92		23.7778		19.3		18.52		18.26
ZT7		26.36		24.5556		19.54		15.62
ZT7.5	25.56		24.54		19.7778		17		14.16
ZT8		23.52		20.1		21.7407		14.16
ZT8.5	24.8519		18.96		15.18		17.5185		11.78
ZT9		23.2593		13.5		10.52		16
ZT9.5	24.52		14.1481		9.56		6.44		10.963
ZT10		21.64		9		5.52		4.62
ZT10.5	18.24		11		4.96296		2.06		1.06
ZT11		3.7		3.94		2.07407		1.14
ZT11.5	7.94		0.66		1.6		2.88889		0
ZT12		7.5		5.94		5.34		10.8519
ZT12.5	18.0741		15.04		12.46		11.36		15.5926
ZT13		22.5185		17.56		17.16		14.62
ZT13.5	19.94		24		21.78		19.98		16.96
ZT14		21.92		26		20.78		19.62
ZT14.5	24.8		21.54		24.7037		21.22		20.14
ZT15		26.34		22.5		23.3704		22.66
ZT15.5	23.7407		26.24		22.7		22.5185		21.94
ZT16		24.7778		25.82		22.52		23.3333
ZT16.5	12.68		25.3704		25.72		23.18		25.5185
ZT17		15.68		24.037		24.8		22.88
ZT17.5	19.64		18.72		22.7407		23.6		20.62
ZT18		24.4		19.52		22.2593		24.36
ZT18.5	24.38		24.12		20.56		21.963		23.76
ZT19		26.04		23.2		18.74		23.1852
ZT19.5	22.8519		24.7		22.52		20.08		23.7407
ZT20		23.2222		25.06		23.9		20.64
ZT20.5	16.72		24.2593		22.24		22.22		20.28
ZT21		20.04		26.1111		23.7		22.14
ZT21.5	21.92		19.94		22.2963		20.54		21.1
ZT22		21.98		20.52		22.5926		22.62
ZT22.5	24.2963		24.18		20.5		24.037		21.48
ZT23		23.963		23.94		19.62		22.3333
ZT23.5	14.78		22.1481		19.54		17.04		20.4074
Baseline
	ZT0	ZT0.5	ZT1	ZT1.5	ZT2	ZT2.5	ZT3	ZT3.5	ZT4	ZT4.5	ZT5	ZT5.5	ZT6	ZT6.5	ZT7	ZT7.5	ZT8	ZT8.5	ZT9	ZT9.5	ZT10	ZT10.5	ZT11	ZT11.5	ZT12	ZT12.5	ZT13	ZT13.5	ZT14	ZT14.5	ZT15	ZT15.5	ZT16	ZT16.5	ZT17	ZT17.5	ZT18	ZT18.5	ZT19	ZT19.5	ZT20	ZT20.5	ZT21	ZT21.5	ZT22	ZT22.5	ZT23	ZT23.5
	0.28	0.14	0.14	1.36	2.26	3.52	5.38	7.52	8.66	11.84	12.82	13.06	12.98	13.2	12.9	10.96	11.38	7.44	5.16	2.6	1.28	1.58	0.86	0.94	4.28	15.52	18.5	20.1	20.96	21.36	20.46	18.98	18.92	17.96	18.28	15.72	19.04	18.62	17.8	18	17.06	17.8	16.6	17.48	17.76	17.94	17.22	12.32
Figure 4 supplement to figure 1C
ZT1.5							ZT9.5
	Sleep lost	Baseline sleep	Sleep gain					Sleep lost	Baseline sleep	Sleep gain		Omitted values represent flies that were not sleep deprived >90% of baseline sleep (see methods)
	48	165	66					59	94	-7
	18	54	62
	54	195	68					146	113	27
								26	0	67
	19	49	142					39	31	87
	59	39	-16					7	61	12
	0	37	50					11	36	1
	0	10	111					45	62	13
	48	95	37					112	61	-13
	0	27	57					63	58	-32
	45	80	26					103	173	-34
	47	62	87					84	99	9
	33	19	65					31	9	21
	54	81	172					72	49	77
Average	32.6923	70.2308	71.3077				Average	61.3846	65.0769	17.5385
Standard error	22.4254	55.0426	48.8491				Standard error	41.3593	46.2502	38.6773
Standard deviation	6.21968	15.2661	13.5483				Standard deviation	11.471	12.8275	10.7272
Figure 4 supplement to figure 1D
ZT1.5							ZT9.5
	Sleep lost	Baseline sleep	Sleep gain					Sleep lost	Baseline sleep	Sleep gain		Omitted values represent flies that were not sleep deprived >90% of baseline sleep (see methods)
								95	98	18
	37	85	73					62	10	62
	31	51	-4					0	124	-10
	20	37	1
	39	44	77					12	7	67
	51	113	107
	0	70	88
	0	0	10					6	2	6
	8	51	55					22	20	49
	62	239	-20					135	154	-50
	52	92	160					93	65	71
	17	184	27					72	54	28
	32	5	160					44	25	88
	32	40	99					14	24	1
	37	161	44					137	70	-13
	34	126	45					76	25	29
	30	40	27					30	131	-16
Average	30.125	83.625	59.3125				Average	57	57.7857	23.5714
Standard error	17.712	66.3193	54.2374				Standard error	46.1453	50.7849	39.9533
Standard deviation	4.42801	16.5798	13.5594				Standard deviation	12.3328	13.5728	10.678
