# Supplementary material for: Circadian programming of the ellipsoid body sleep homeostat in Drosophila
Source: eLife. 2022 Jun 23;11:e74327. doi: 10.7554/eLife.74327 (PMC9270026; doi:10.7554/eLife.74327)
Supplement: Figure 4—source data 1. [file elife-74327-fig4-data1.xlsx]

## Sheet: Figure 4
Figure 4D
	pBDP split>hid Average	pBDP split>hid SE
	0.49495	0.0687782
	0.574277	0.0654026
	0.570057	0.0991587
	0.387352	0.0303805
	0.490308	0.0447269
	0.376381	0.115615
	0.452333	0.0346001
	0.582716	0.290725
	0.654026	0.00843904
	0.716053	0.104222
	0.662887	0.0333342
	0.624911	0.108442
	1.92579	0.0362879
	1.77135	0.00675123
	1.73043	0.044305
	1.58992	0.0430391
	1.46333	0.0396635
	1.40805	0.00801709
	1.40805	0.0417733
	1.16501	0.0856563
	1.1321	0.0113927
	1.09665	0.0206757
	1.02914	0.0417733
	0.930404	0.0248952
	0.906353	0.0472586
	0.954034	0.110973
	0.868799	0.0485245
	0.949392	0.043883
	0.952768	0.128273
	0.997917	0.0198317
	1.09581	0.0426172
	1.25109	0.0206757
	1.34856	0.0219415
	1.37472	0.00253171
	1.54603	0.0447269
	1.60004	0.105488
	1.93634	0.0670904
	0.956565	0.0763733
	0.859094	0.172156
	0.762045	0.0160342
	0.643477	0.112661
	0.764999	0.0232074
	0.919012	0.0911416
	0.900446	0.102956
	0.898336	0.0510562
	0.742214	0.129539
	0.773438	0.202115
	0.762045	0.135869
Figure 4E
	r51h05; r18h11> + Average	r51h05; r18h11> + SE
	0.683057	0.161802
	0.472811	0.156958
	0.567761	0.131767
	0.5852	0.403052
	0.725687	0.0765411
	0.35267	0.0251907
	0.219935	0.0804166
	0.515441	0.0523192
	0.759598	0.203464
	0.6288	0.0881676
	0.716967	0.062008
	1.00763	0.122078
	2.66441	0.00968875
	2.18675	0.130798
	1.96488	0.00581325
	1.84377	0.0164709
	1.78661	0.069759
	1.57636	0.0978564
	1.26148	0.0368172
	1.10742	0.221872
	0.872956	0.289694
	0.577449	0.153082
	0.560979	0.188931
	0.419523	0.121109
	0.435994	0.211215
	0.488313	0.0251907
	0.712123	0.0416616
	0.663679	0.20637
	0.777038	0.0445682
	1.04251	0.114327
	1.38646	0.0726656
	1.49207	0.0639457
	1.64612	0.0319729
	1.76626	0.0377861
	1.89512	0.0213152
	2.05983	0.069759
	2.61887	0.0901054
	1.27988	0.154051
	0.645271	0.203464
	0.393363	0.21509
	0.548383	0.211215
	0.497033	0.111421
	0.362359	0.0406927
	0.524161	0.0106576
	0.414678	0.0213152
	0.590045	0.115296
	0.780913	0.445682
	0.9214	0.256752
Figure 4F
	r51h05 r18h11 >hid Average	r51h05 r18h11 >hid SE
	0.799639	0.00369958
	0.828179	0.0766343
	0.928596	0.143227
	0.936523	0.0264256
	0.684423	0.0798053
	0.637914	0.16331
	0.917497	0.0761057
	0.845619	0.0486231
	0.780084	0.102531
	0.877859	0.067121
	0.965592	0.0533797
	1.13472	0.0184979
	1.85032	0.00158554
	1.60932	0.0998888
	1.41853	0.085619
	1.37466	0.065007
	1.20448	0.0576078
	0.977747	0.00739917
	1.04381	0.135828
	0.844034	0.0132128
	0.862532	0.0951322
	0.627872	0.0517942
	0.719834	0.103588
	0.780612	0.0745202
	0.597747	0.0385814
	0.782726	0.0343533
	0.704507	0.0946037
	0.714548	0.00528512
	0.99096	0.0449235
	1.04804	0.00898471
	0.890014	0.0169124
	1.16114	0.0417525
	1.16061	0.119444
	1.26103	0.00105702
	1.36885	0.0591934
	1.57655	0.0110988
	2.22556	0.234131
	1.78056	0.238359
	1.23302	0.104117
	0.750487	0.0327678
	0.547539	0.0391099
	0.646899	0.0750487
	0.876802	0.0850905
	0.853547	0.190793
	0.71032	0.0285397
	0.841391	0.0380529
	0.83135	0.00264256
	0.795411	0.0681781
Figure 4G
		R51H05AD;R18H11DBD > hid		pBDP SPLIT > hid		R51H05AD;R18H11DBD > +
	Time (ZT)	Sleep	SE	Sleep	SE	Sleep	SE
	0	0.52381	0.214021	0.556	0.242	0.5	0.135724
	0.5	1.42857	0.791537	0	0	0.9	0.623656
	1	3.28571	1.03772	0	0	0.75	0.517458
	1.5	6.57143	1.70094	1.111	1.111	1.15	0.886373
	2	7.85714	2.2385	2.556	1.923	0.6	0.419273
	2.5	6.38095	1.97903	3.111	1.662	2.45	1.28652
	3	8	1.79018	2.889	2.239	5.3	1.36709
	3.5	10.1905	1.94767	8.889	4.231	10.65	1.90881
	4	13.8571	2.37275	5.556	3.379	16.5	2.27515
	4.5	15.1429	2.38076	12.333	4.595	19.75	2.27443
	5	15.2381	2.51084	9.889	4.022	21.25	2.16172
	5.5	12.4762	2.38709	12.111	3.569	23.85	1.77152
	6	14.4762	2.43058	8.778	3.919	25.4	1.72657
	6.5	14.0476	2.28918	16.667	4.23	19.4	2.53336
	7	12.9524	2.34061	14.889	3.381	17.6	2.28197
	7.5	14.8571	2.52255	10.556	3.888	12.85	2.6992
	8	9.33333	2.10705	6.667	2.698	17.1	2.32933
	8.5	8.66667	2.18799	6.111	2.579	9.4	2.38018
	9	9.47619	2.27368	5.778	2.608	5.1	1.31569
	9.5	6.71429	1.98583	0.667	0.667	2.45	0.963751
	10	7.09524	1.81646	1.667	1.13	2.4	1.09641
	10.5	6.19048	1.64551	0.778	0.778	1.3	0.768115
	11	4.7619	1.68735	0	0	0.4	0.4
	11.5	1.47619	0.779557	1.222	1.222	1.35	0.685469
	12	5.14286	1.60102	3	2.121	5.95	1.41324
	12.5	9.23809	2.54475	11.333	4.045	15.65	2.78367
	13	10.2381	2.52596	16.667	4.543	21.85	2.22932
	13.5	14.5238	2.55848	22.222	2.727	23.7	1.96964
	14	17.8571	2.27123	21.889	3.626	21.95	2.22246
	14.5	18.0476	2.57319	22.111	3.47	23.05	1.82595
	15	17.8571	2.43417	21.444	3.571	26.1	1.14225
	15.5	14.7143	2.26899	20.333	2.759	23.6	2.02146
	16	16.1429	2.67554	23.556	3.228	25.7	1.74582
	16.5	19	2.79966	23.333	2.357	24.4	2.12553
	17	18.3333	2.27861	17.667	3.621	19.5	2.45753
	17.5	17.4286	2.35187	16.222	4.475	17.85	2.90578
	18	15.8095	2.45494	14.444	3.262	20.95	2.21891
	18.5	17.5238	2.55102	25.889	2.48	21.35	2.46264
	19	18	2.35736	29.222	0.434	22.35	2.44118
	19.5	16.3809	2.58519	26.556	1.582	22.45	2.43816
	20	19.9524	2.32837	26.111	2.091	24.5	1.76888
	20.5	17.4286	1.98994	27.333	1.404	26.2	1.71924
	21	13.4762	2.50867	23	2.672	21.65	2.45515
	21.5	17.2857	2.34129	27	0.833	17.35	2.73407
	22	15.7619	2.32779	22.444	3.512	16.55	2.80739
	22.5	16.4762	2.37007	22.778	3.463	20.6	2.69639
	23	13.0952	2.21134	14	3.629	24.35	1.93347
	23.5	11.7143	2.29196	14.889	4.82	16.45	2.50208
Figure 4H
ZT1.5							ZT9.5
	Sleep lost	Baseline sleep	Sleep gain					Sleep lost	Baseline sleep	Sleep gain	Omitted values represent flies that were not sleep deprived >90% of baseline sleep (see methods)
	20	45	114					47	33	60
	57	72	148					48	163	-31
	71	98	172					77	112	48
	22	19	91					41	0	59
	4	23	197					40	88	98
	12	11	173					16	0	51
	62	107	91					110	95	61
	40	0	88					9	22	67
	55	0	0					18	47	44
	17	0	41					5	0	41
	50	54	169					103	92	-7
	35	0	106					14	77	-28
	22	141	19					83	99	13
	0	42	61					71	134	-39
	53	60	133					49	106	27
	31	0	155					0	0	62
	53	43	125					18	40	35
	61	2	115					30	97	-21
	61	126	-46					58	9	64
	43	0	33					0	0	16
	54	17	82					47	51	8
	0	5	178					0	56	-8
	53	0	178					52	95	-29
	45	62	105					67	94	-25
	54	8	156					26	98	-32
	44	6	32					67	14	26
Average	39.1923	36.1923	104.462				Average	42.1538	62.3846	21.5385
Standard error	20.8193	42.5977	63.1242				Standard error	31.3684	47.4764	39.3571
Standard deviation	4.08299	8.35409	12.3797				Standard deviation	6.15185	9.31088	7.71856
Figure 4I											Omitted values represent flies that were not sleep deprived >90% of baseline sleep (see methods)
ZT1.5							ZT10.5
	Sleep lost	Baseline sleep	Sleep gain					Sleep lost	Baseline sleep	Sleep gain
	48	165	66					45	143	-109
	18	54	62
	54	195	68					109	150	-44
								7	0	23
	19	49	142
	59	39	-16					0	121	6
	0	37	50					1	50	19
	0	10	111					15	113	-3
	48	95	37
	0	27	57					12	106	42
	45	80	26					96	178	24
	47	62	87
	33	19	65					10	39	-10
	54	81	172					19	71	49
Average	32.6923	70.2308	71.3077				Average	31.4	97.1	-0.3
Standard error	22.4254	55.0426	48.8491				Standard error	39.6406	55.834	46.6573
Standard deviation	6.21968	15.2661	13.5483				Standard deviation	12.5355	17.6563	14.7543
Figure 4J											Omitted values represent flies that were not sleep deprived >90% of baseline sleep (see methods)
ZT1.5							ZT10.5
	Sleep lost	Baseline sleep	Sleep gain					Sleep lost	Baseline sleep	Sleep gain
								35	136	-16
	37	85	73					13	10	89
	31	51	-4					14	158	-63
	20	37	1					0	0	45
	39	44	77					0	32	20
	51	113	107					56	188	58
	0	70	88					9	27	56
	0	0	10					0	29	-24
	8	51	55					5	55	48
	62	239	-20					127	146	-36
	52	92	160					66	66	142
	17	184	27					65	53	14
	32	5	160					4	82	60
	32	40	99					19	68	20
	37	161	44					103	113	79
	34	126	45					53	61	35
	30	40	27					30	144	-77
Average	30.125	83.625	59.3125				Average	35.2353	80.4706	26.4706
Standard error	17.712	66.3193	54.2374				Standard error	38.0222	56.7309	56.5079
Standard deviation	4.42801	16.5798	13.5594				Standard deviation	9.22175	13.7593	13.7052
Figure 4K
	pBDP split > hid	Glu+ DN1p > +	Glu+DN1p > hid
	114
	148	66	73
	172	62
	91		-4
	197	68	1
	173
	91
	88		77
	0		107
	41	142	88
	169	-16
	106	50	10
	19		55
	61	111	-20
	133	37	160
	155		27
	125	57
	115	26	160
	-46	87
	33	65	99
	82	172	44
	178
	178		45
	105		27
	156
	32
