# Supplementary material for: Circadian programming of the ellipsoid body sleep homeostat in Drosophila
Source: eLife. 2022 Jun 23;11:e74327. doi: 10.7554/eLife.74327 (PMC9270026; doi:10.7554/eLife.74327)
Supplement: Figure 5—figure supplement 1—source data 1. [file elife-74327-fig5-figsupp1-data1.xlsx]

## Sheet: Supplemental figure 5
Figure 5 supplement to figure 1C
ZT1.5							ZT10.5
	Sleep lost	Baseline sleep	Sleep gain					Sleep lost	Baseline sleep	Sleep gain		Omitted values represent flies that were not sleep deprived >90% of baseline sleep (see methods)
	68	6	224					53	43	12
	6	8	182					36	29	43
	56	0	157					57	66	81
	63	14	154					32	0	107
	6	11	216					32	6	115
	83	25	159					41	46	75
	23	0	36					19	9	78
	37	17	222					1	43	90
	29	8	141
	19	6	204					49	37	176
	11	0	158					0	21	79
	45	40	117					15	13	82
	88	76	114					70	50	101
	57	5	94					49	12	67
	34	58	178					71	25	107
								37	6	94
	0	23	153					74	5	110
	38	49	67					61	68	49
	11	104	55					73	48	92
								53	36	45
Average	37.4444	25	146.167				Average	43.3158	29.6316	84.3684
Standard error	27.0212	29.3979	56.4678				Standard error	22.9348	21.0534	34.7214
Standard deviation	6.36895	6.92915	13.3096				Standard deviation	5.26161	4.82998	7.96565
Figure 5 supplement to figure 1D
ZT1.5							ZT9.5
	Sleep lost	Baseline sleep	Sleep gain					Sleep lost	Baseline sleep	Sleep gain		Omitted values represent flies that were not sleep deprived >90% of baseline sleep (see methods)
	50	0	258					19	53	94
	34	24	205					5	10	104
	62	14	173					6	39	72
	36	28	201					0	43	7
	56	24	164					5	47	96
	57	77	154					43	126	42
	68	75	127					39	114	46
	48	0	254					11	89	119
	55	60	155					34	90	49
	30	46	196					77	64	89
	41	25	170					15	27	104
	30	155	100					30	98	99
	44	0	109					8	14	75
	53	33	150					0	36	98
	61	0	228					15	91	50
	52	0	92
	61	87	103					31	67	9
	57	68	53					75	121	-23
	37	13	177					6	19	85
	62	22	82					5	80	-12
Average	49.7	37.55	157.55				Average	22.3158	64.6316	63.3158
Standard error	11.1133	8.39644	35.2293				Standard error	5.11959	14.8275	14.5256
Standard deviation	2.485	1.8775	7.8775				Standard deviation	1.17452	3.40166	3.33241
