# Supplementary material for: Circadian programming of the ellipsoid body sleep homeostat in Drosophila
Source: eLife. 2022 Jun 23;11:e74327. doi: 10.7554/eLife.74327 (PMC9270026; doi:10.7554/eLife.74327)
Supplement: Figure 5—figure supplement 2—source data 1. [file elife-74327-fig5-figsupp2-data1.xlsx]

## Sheet: Sheet3
Figure 5 supplement to figure 2A
ZT1.5						ZT9.5
	Sleep lost	Baseline sleep	Sleep gain					Sleep lost	Baseline sleep	Sleep gain		Omitted values represent flies that were not sleep deprived >90% of baseline sleep (see methods)
	68	6	224					46	26	97
	6	8	182					19	51	66
	56	0	157					74	37	172
	63	14	154					19	19	90
	6	11	216					42	18	113
	83	25	159					72	49	77
	23	0	36					0	28	127
	37	17	222					61	29	105
	29	8	141					5	6	119
	19	6	204					86	37	195
	11	0	158
	45	40	117					30	13	117
	88	76	114					111	36	155
	57	5	94					109	0	17
	34	58	178					82	40	114
								58	14	116
	0	23	153					36	43	121
	38	49	67					59	78	15
	11	104	55					79	68	147
								69	35	68
Average	37.4444	25	146.167				Average	55.6316	33	106.895
Standard error	27.0212	29.3979	56.4678				Standard error	32.1199	19.8802	45.9092
Standard deviation	6.36895	6.92915	13.3096				Standard deviation	7.36882	4.56083	10.5323
Figure 5 supplement to figure 2B
ZT1.5						ZT9.5
	Sleep lost	Baseline sleep	Sleep gain					Sleep lost	Baseline sleep	Sleep gain		Omitted values represent flies that were not sleep deprived >90% of baseline sleep (see methods)
	45	50	119					75	57	113
	60	120	52					35	95	104
	36	63	109					55	47	161
	104	154	42					110	216	-6
	38	34	135					0	46	191
	26	104	119					72	174	28
	60	42	182					43	137	118
	33	7	177					30	60	175
	60	95	159					127	183	77
	55	71	114					101	130	84
	59	93	32					55	202	11
	21	92	67					40	86	137
	114	141	122					82	198	67
	45	43	189					41	89	178
	80	177	83					80	200	61
	70	88	95					99	171	78
	81	96	51					79	107	140
	100	209	36					96	219	25
	135	195	30					121	228	13
	107	224	-20					136	220	-8
	81	148	120					91	212	25
Average	67.1429	106.952	95.8571				Average	74.6667	146.524	84.381
Standard error	31.2559	60.4727	56.6986				Standard error	35.5434	65.0919	63.5488
Standard deviation	6.82059	13.1962	12.3726				Standard deviation	7.75621	14.2042	13.8675
Figure 5 supplement to figure 2C
ZT1.5						ZT9.5
	Sleep lost	Baseline sleep	Sleep gain					Sleep lost	Baseline sleep	Sleep gain		Omitted values represent flies that were not sleep deprived >90% of baseline sleep (see methods)
	0	63	160					45	0	190
	42	114	20					97	64	69
	44	47	132					77	69	58
	62	31	97					66	20	82
	38	38	84					47	19	49
	56	66	38					43	17	29
	61	22	154					53	76	66
	15	66	111					124	96	105
	24	15	68					81	15	47
								121	96	160
	53	92	101					93	83	64
	45	197	-36					147	129	63
	0	59	121					111	17	224
	55	57	139					110	85	83
	64	77	117					44	99	84
	63	0	192
	20	46	22					88	22	34
	55	14	99					89	26	89
	41	14	153					61	23	113
	28	57	88					55	42	40
	38	11	76					41	11	73
	25	90	164					106	64	148
	67	140	-1					91	147	-18
	45	141	5					87	88	60
	62	56	91					57	21	109
	66	136	68					118	184	19
	60	58	29					96	8	77
Average	43.4231	65.6538	88.1538				Average	82.6154	58.5	81.4231
Standard error	8.51597	12.8758	17.2884				Standard error	16.2022	11.4728	15.9684
Standard deviation	1.67012	2.52515	3.39053				Standard deviation	3.17751	2.25	3.13166
