# Supplementary material for: Circadian programming of the ellipsoid body sleep homeostat in Drosophila
Source: eLife. 2022 Jun 23;11:e74327. doi: 10.7554/eLife.74327 (PMC9270026; doi:10.7554/eLife.74327)
Supplement: Figure 5—source data 1. [file elife-74327-fig5-data1.xlsx]

## Sheet: Figure 5
Figure 5B
ZT1.5							ZT10.5
	Sleep lost	Baseline sleep	Sleep gain					Sleep lost	Baseline sleep	Sleep gain		Omitted values represent flies that were not sleep deprived >90% of baseline sleep (see methods)
	68	6	224					53	43	12
	6	8	182					36	29	43
	56	0	157					57	66	81
	63	14	154					32	0	107
	6	11	216					32	6	115
	83	25	159					41	46	75
	23	0	36					19	9	78
	37	17	222					1	43	90
	29	8	141
	19	6	204					49	37	176
	11	0	158					0	21	79
	45	40	117					15	13	82
	88	76	114					70	50	101
	57	5	94					49	12	67
	34	58	178					71	25	107
								37	6	94
	0	23	153					74	5	110
	38	49	67					61	68	49
	11	104	55					73	48	92
								53	36	45
Average	37.4444	25	146.167				Average	43.3158	29.6316	84.3684
Standard error	27.0212	29.3979	56.4678				Standard error	22.9348	21.0534	34.7214
Standard deviation	6.36895	6.92915	13.3096				Standard deviation	5.26161	4.82998	7.96565
Figure 5C
ZT1.5							ZT8.5
	Sleep lost	Baseline sleep	Sleep gain					Sleep lost	Baseline sleep	Sleep gain		Omitted values represent flies that were not sleep deprived >90% of baseline sleep (see methods)
	45	50	119					56	86	101
	60	120	52					53	84	44
	36	63	109					29	49	217
	104	154	42					114	217	5
	38	34	135					0	5	194
	26	104	119					81	159	23
	60	42	182					32	98	152
	33	7	177					10	51	185
	60	95	159					113	172	78
	55	71	114					99	118	100
	59	93	32					77	146	79
	21	92	67					72	74	144
	114	141	122					97	170	27
	45	43	189					49	74	153
	80	177	83					92	169	94
	70	88	95					84	182	66
	81	96	51					61	109	34
	100	209	36					115	210	18
	135	195	30					149	201	52
	107	224	-20					133	215	-47
	81	148	120					122	172	84
Average	67.1429	106.952	95.8571				Average	78	131.476	85.8571
Standard error	31.2559	60.4727	56.6986				Standard error	40.2716	62.0481	68.4779
Standard deviation	6.82059	13.1962	12.3726				Standard deviation	8.78798	13.54	14.9431
Figure 5D
ZT1.5							ZT10.5
	Sleep lost	Baseline sleep	Sleep gain					Sleep lost	Baseline sleep	Sleep gain		Omitted values represent flies that were not sleep deprived >90% of baseline sleep (see methods)
	34	63	155					5	88	73
	0	52	171					0	64	35
	20	23	195					11	70	55
	60	0	183					5	43	39
	62	45	185					29	79	92
	62	0	150					15	36	62
	22	0	34					16	57	12
	13	32	228
	55	43	71					7	39	-3
	63	84	48					29	21	91
	62	68	187					95	16	114
	53	58	187					118	36	57
								63	26	65
	54	0	129					62	20	43
	60	0	138					8	34	61
	14	5	4					5	15	46
	42	6	113					5	86	5
	42	136	25
	47	91	162					37	117	90
	16	18	232					39	132	92
	60	28	159					9	69	44
	61	109	91					63	170	-45
	62	36	228					5	49	134
Average	43.8182	40.7727	139.773				Average	29.8095	60.3333	55.3333
Standard error	9.34207	8.69277	29.7996				Standard error	6.50497	13.1658	12.0747
Standard deviation	1.99174	1.85331	6.35331				Standard deviation	1.4195	2.87302	2.63492
Figure 5E
ZT1.5							ZT10.5
	Sleep lost	Baseline sleep	Sleep gain					Sleep lost	Baseline sleep	Sleep gain		Omitted values represent flies that were not sleep deprived >90% of baseline sleep (see methods)
	0	63	160					27	24	45
	42	114	20					101	31	110
	44	47	132					61	90	70
	62	31	97					46	40	34
	38	38	84					25	12	40
	56	66	38					22	12	47
	61	22	154					60	107	58
	15	66	111					104	85	7
	24	15	68					59	0	39
	53	92	101					100	33	120
	45	197	-36					138	109	2
	0	59	121					62	20	194
	55	57	139					99	91	81
	64	77	117					40	122	45
	63	0	192					20	13	135
	20	46	22					62	9	57
	55	14	99					76	32	215
	41	14	153					57	23	87
	28	57	88					50	57	22
	38	11	76					24	11	53
	25	90	164					94	35	147
	67	140	-1					77	142	0
	45	141	5					77	85	61
	62	56	91					34	18	97
	66	136	68					121	182	68
	60	58	29					55	3	106
Average	43.4231	65.6538	88.1538				Average	65.0385	53.3077	74.6154
Standard error	8.51597	12.8758	17.2884				Standard error	12.7551	10.4545	14.6333
Standard deviation	1.67012	2.52515	3.39053				Standard deviation	2.50148	2.0503	2.86982
Figure 5F
ZT1.5							ZT9.5
	Sleep lost	Baseline sleep	Sleep gain					Sleep lost	Baseline sleep	Sleep gain		Omitted values represent flies that were not sleep deprived >90% of baseline sleep (see methods)
	33	0	35					61	41	19
								10	16	110
	61	0	124					29	11	145
	14	181	-54					94	92	70
	13	29	156					55	58	45
	17	0	154					60	0	143
	5	0	109					25	7	115
	60	63	121					22	21	118
	0	8	68
								17	18	248
	32	76	143
	0	0	105					0	0	157
	18	18	121					75	63	137
	0	0	144					0	0	138
	34	58	120					78	63	114
	54	22	84					13	81	40
	33	139	123					115	51	211
	52	1	205					24	59	121
	65	36	155					81	127	112
	37	24	246					102	62	201
	46	30	128					39	114	-20
	51	74	156					93	129	89
	34	6	160					56	101	38
	71	165	98					95	207	25
	22	25	200					42	45	198
	33	72	146					82	93	120
	62	47	161					43	101	-31
	43	22	190					47	74	123
	31	107	21					111	113	105
Average	34.1111	44.5556	126.63				Average	54.4074	64.7037	107.074
Standard error	21.1412	51.4276	60.5971				Standard error	34.7732	49.6231	68.0034
Standard deviation	4.06862	9.89724	11.6619				Standard deviation	6.6921	9.54996	13.0873
