# Supplementary material for: Circadian programming of the ellipsoid body sleep homeostat in Drosophila
Source: eLife. 2022 Jun 23;11:e74327. doi: 10.7554/eLife.74327 (PMC9270026; doi:10.7554/eLife.74327)
Supplement: Figure 6—figure supplement 1—source data 1. [file elife-74327-fig6-figsupp1-data1.xlsx]

## Sheet: Figure 6 supplement 1
Figure 6 supplement to figure 1A
Sleep during rebound
	30	60	90	120	150	180	210	240	270
ZT0		6.66667		8.38095		6.02778		1.77778
ZT0.5	23.0556		9.38889		11.4286		6.19444		1.25
ZT1		21.6667		9.80556		13.3333		9.33333
ZT1.5	25.5714		18.9722		10.2222		17.8095		11.9444
ZT2		25.7619		18.5833		14.6111		19.2857
ZT2.5	26.5278		24.2857		16.3611		13.3611		16.8095
ZT3		27.7778		25.6667		17.1389		16.1111
ZT3.5	24.1111		28.3056		21.6667		16.1667		14.7778
ZT4		26.8889		22.8611		22		17.5278
ZT4.5	27.9722		26.6944		20.6111		24.7143		17
ZT5		28.1389		26.4167		21.2222		24.8095
ZT5.5	29.4286		26.9167		25.2778		22.8056		22.5238
ZT6		28.2381		27.25		24.6389		23.3056
ZT6.5	27.8056		29.381		26		24.0278		23.5833
ZT7		29.1944		27.7619		25		21.0833
ZT7.5	28.4444		28.6111		27.7143		22.0833		18.8056
ZT8		27.25		27.3333		24.7619		20.5556
ZT8.5	28.8095		25.3333		25.5278		23.8095		15.5833
ZT9		25.6667		20.3056		15.9167		20.619
ZT9.5	24.4722		17.381		9.13889		10.1389		15
ZT10		15.7222		9.19048		5.47222		4.44444
ZT10.5	18.8889		4.66667		2.7619		2.27778		2.52778
ZT11		2.5		0.416667		2.71429		1.44444
ZT11.5	5.16667		1.27778		0		1.80952		0.722222
ZT12		7.63889		8.52778		6.66667		6.2381
ZT12.5	16.7143		14.5		16.5833		13.7222		13.5714
ZT13		17.5714		16.9167		17.9722		16.25
ZT13.5	22.75		19.1905		16.1667		20.0278		18.3611
ZT14		25.3333		22.3333		19.3611		18.25
ZT14.5	25.25		24.75		19.5238		19.4722		18.4444
ZT15		27.8611		25.9722		22.1905		18.3333
ZT15.5	27.9048		27.4444		26.25		21.8571		18.5278
ZT16		28.9048		28.1111		24.3333		24.5714
ZT16.5	21.6111		28.2381		27.3889		22.3889		23.8571
ZT17		26		26.381		26.8889		22.4722
ZT17.5	23.0556		24.9444		26		25.5278		21.9444
ZT18		27.75		24.5833		25.9524		25.0833
ZT18.5	23.3889		25.1389		24.5556		24.6667		23.6389
ZT19		28.0833		25.6944		23.3333		25.4286
ZT19.5	25.2381		26.6111		25		23.6667		26.2381
ZT20		27.2381		25.9722		24.3611		23.6111
ZT20.5	21.4722		27.381		24.8889		23.9167		22.3611
ZT21		27.1111		26.3333		24.6667		24.2222
ZT21.5	25.2778		26.5833		25.6667		24.5		23.5
ZT22		27.7778		23.6944		24.2857		23.4167
ZT22.5	26.5714		26.7778		22.2778		25.619		23.4722
ZT23		26.3333		26.0833		20.1389		24.8571
ZT23.5	21.9167		26.4762		24.0278		21.4167		21.8095
Baseline
	ZT0	ZT0.5	ZT1	ZT1.5	ZT2	ZT2.5	ZT3	ZT3.5	ZT4	ZT4.5	ZT5	ZT5.5	ZT6	ZT6.5	ZT7	ZT7.5	ZT8	ZT8.5	ZT9	ZT9.5	ZT10	ZT10.5	ZT11	ZT11.5	ZT12	ZT12.5	ZT13	ZT13.5	ZT14	ZT14.5	ZT15	ZT15.5	ZT16	ZT16.5	ZT17	ZT17.5	ZT18	ZT18.5	ZT19	ZT19.5	ZT20	ZT20.5	ZT21	ZT21.5	ZT22	ZT22.5	ZT23	ZT23.5
	0.277778	0.666667	1.11111	0.944444	2.77778	2.02778	4.13889	7.38889	11.1944	15.8889	19.0833	20.3611	20.9444	21.8333	16.1389	12.1667	8.19444	6.13889	3.22222	2.16667	2.97222	1.33333	1.22222	1.05556	7.72222	20.4444	20.0556	21.2222	22.1667	23.3889	21.75	19.6944	19.1667	21.3056	22.0278	21.8611	21.5	22.6111	21.9167	21.9722	26.1389	22.7222	19.0556	17.9167	17.9444	22.3889	21.2222	17.3333
Figure 6 supplement to figure 1B
	30	60	90	120	150	180	210	240	270
ZT0		13.8333		21.5		16.6944		9.55556
ZT0.5	22.8056		14.2778		23.3846		16.8889		9.16667
ZT1		23.6667		15.5833		23.9231		19.6944
ZT1.5	27.4231		25.9444		15.3611		20.8077		20.3611
ZT2		27.6154		24.7778		16.9167		24.1923
ZT2.5	27.5556		28.1154		25.8056		18.3889		24.5385
ZT3		29.6944		28.9615		26.6389		22.1111
ZT3.5	23.8056		29.8056		28.3077		25.4444		20.0833
ZT4		28.5556		27.2778		28.0385		24.9722
ZT4.5	27.1944		29.1944		24.4444		28.2308		25.25
ZT5		29.2222		28.8889		24.75		28.5
ZT5.5	27.8846		29.6389		28.7222		25.5833		28.7308
ZT6		28.8077		29.5556		28.5278		26.3333
ZT6.5	28.5833		29.0769		29.4722		28.3889		25.3889
ZT7		29.2778		27.9231		28.6389		28.25
ZT7.5	27.3889		28.1389		28.5769		28.3611		27.5833
ZT8		28.1111		28.3056		28.2692		27.5833
ZT8.5	27.5769		29.5		28.1944		27.4615		25.6389
ZT9		27.1923		28.9722		26.1667		27.5769
ZT9.5	27.25		28.3077		26.7222		25.3333		25.3077
ZT10		28.0833		27.2308		26.0278		24.0833
ZT10.5	24.4444		26.0556		26.5385		26.1944		19.8056
ZT11		25.8056		20.9167		25.7692		22.0556
ZT11.5	25.7222		23.1111		19.2778		26.3077		20
ZT12		27.3611		25.5833		17.9444		26.2308
ZT12.5	25.3846		28.75		28.9167		25.25		26.2308
ZT13		27.3077		29.1944		27.7778		24.9444
ZT13.5	26.1944		27.5385		29.5		28.1667		24.3889
ZT14		28.3333		27.4231		28.1111		28.4444
ZT14.5	27.3611		28.6944		27.2692		28.5833		27.1944
ZT15		28.6389		29.1111		27.9231		28.5278
ZT15.5	27.8077		28.9722		28.6944		28.2692		27.7222
ZT16		28.5769		29.2778		28.7222		27.8846
ZT16.5	22.6944		28.5		29.1667		28.8611		27.7692
ZT17		26.7778		28.2308		29.25		28.3333
ZT17.5	27.3611		27.5556		28.7308		28.6667		28.5
ZT18		28.75		28		29.0385		28.8611
ZT18.5	28.4167		29.0833		27.8611		27.8077		28.5
ZT19		29.75		29		28.1944		28.4615
ZT19.5	28.2308		29.7778		29.5		28.9444		27.9231
ZT20		29.3846		29.5833		29.0556		29.1111
ZT20.5	27.0556		28.1154		29.2778		29.25		28.6111
ZT21		28.9167		28.5769		29.3333		29.0556
ZT21.5	27.1389		28.8056		28.5385		29.7222		28.6111
ZT22		28.8611		28.5		29.1923		28.7222
ZT22.5	28		28.8333		28.5833		28.2692		28.9722
ZT23		29.6154		29.0556		27.5833		27.6923
ZT23.5	21.8611		29.3077		28.25		26.8889		26.6538
Baseline
	ZT0	ZT0.5	ZT1	ZT1.5	ZT2	ZT2.5	ZT3	ZT3.5	ZT4	ZT4.5	ZT5	ZT5.5	ZT6	ZT6.5	ZT7	ZT7.5	ZT8	ZT8.5	ZT9	ZT9.5	ZT10	ZT10.5	ZT11	ZT11.5	ZT12	ZT12.5	ZT13	ZT13.5	ZT14	ZT14.5	ZT15	ZT15.5	ZT16	ZT16.5	ZT17	ZT17.5	ZT18	ZT18.5	ZT19	ZT19.5	ZT20	ZT20.5	ZT21	ZT21.5	ZT22	ZT22.5	ZT23	ZT23.5
	0.666667	0.111111	0.166667	0.277778	0.444444	1.88889	2.05556	3.72222	4.83333	7.88889	12.1944	12.8056	12.8056	13.3056	11.3056	9.5	5.63889	7.05556	4.52778	2.25	2.55556	1.08333	1.44444	2.02778	5.02778	16.5833	17.0556	20.1389	18.4167	17.6111	19.1111	16.3333	15.3333	18.5556	17.4167	17.9444	18.8889	19.9722	20.9167	19.8889	18.4167	17.3889	18.1944	18.5	23.75	20.8056	18.25	18.1667
Figure 6 supplement to figure 1C
ZT1.5							ZT9.5
	Sleep lost	Baseline sleep	Sleep gain					Sleep lost	Baseline sleep	Sleep gain		Omitted values represent flies that were not sleep deprived >90% of baseline sleep (see methods)
	27	162	108					77	37	27
	47	84	79					67	66	39
	46	43	165					58	10	63
	0	164	86					73	86	4
	39	123	143					79	107	17
	44	118	110					102	56	98
	44	66	180					51	60	47
	60	64	199
	14	224	5					26	0	85
	60	142	121					104	64	42
	6	103	167					85	79	60
	60	173	96					76	107	23
								73	43	70
	46	11	82					14	50	59
	61	95	174					70	56	14
	34	76	182					119	104	53
	35	67	186					36	11	81
	51	162	108					135	49	132
	39	109	94					73	81	38
	66	95	95
								56	69	45
								40	129	-31
	50	153	91
	37	34	213					0	111	-50
	60	40	98
								45	88	50
Average	42.0909	104.909	126.455				Average	66.3182	66.5	43.9091
Standard error	17.819	53.9064	50.9666				Standard error	32.5787	34.3328	40.1425
Standard deviation	3.79901	11.4929	10.8661				Standard deviation	6.9458	7.31977	8.55841
