# Supplementary material for: Circadian programming of the ellipsoid body sleep homeostat in Drosophila
Source: eLife. 2022 Jun 23;11:e74327. doi: 10.7554/eLife.74327 (PMC9270026; doi:10.7554/eLife.74327)
Supplement: Figure 6—figure supplement 2—source data 1. [file elife-74327-fig6-figsupp2-data1.xlsx]

## Sheet: figure 6 supplement 2
Figure 6 supplement to figure 2A
ZT1.5							ZT9.5
	Sleep lost	Baseline sleep	Sleep gain					Sleep lost	Baseline sleep	Sleep gain		Omitted values represent flies that were not sleep deprived >90% of baseline sleep (see methods)
	56	71	-39					108	149	-52
	64	47	6					62	31	-1
	35	0	68					0	28	70
	37	42	89					48	82	78
	52	85	69					46	57	17
	27	12	126					30	48	33
	40	44	218					149	89	52
	33	99	165					94	70	73
	29	0	202
	40	22	213					25	42	20
	57	94	174					101	109	15
	19	74	173					63	12	151
	48	0	35					39	95	-11
	61	128	35					80	100	16
	50	59	101					66	80	3
	31	31	131					12	97	16
	55	0	0					18	47	44
	17	0	41					5	0	41
	50	54	169					103	92	-7
	35	0	106					14	77	-28
	22	141	19					83	99	13
	0	42	61					71	134	-39
	53	60	133					49	106	27
	31	0	155					0	0	62
	53	43	125					18	40	35
	61	2	115					30	97	-21
	61	126	-46					58	9	64
	43	0	33					0	0	16
	54	17	82					47	51	8
	0	5	178					0	56	-8
	53	0	178					52	95	-29
	45	62	105					67	94	-25
	54	8	156					26	98	-32
	47	78	87					11	77	-4
Average	41.5588	42.5294	101.853				Average	47.7273	68.5152	18.0909
Standard error	16.5423	42.0823	70.7776				Standard error	37.1578	38.9592	41.7331
Standard deviation	2.83698	7.21706	12.1383				Standard deviation	6.46835	6.78193	7.26479
Figure 6 supplement to figure 2B
ZT1.5							ZT9.5
	Sleep lost	Baseline sleep	Sleep gain					Sleep lost	Baseline sleep	Sleep gain		Omitted values represent flies that were not sleep deprived >90% of baseline sleep (see methods)
	75	176	94					65	74	190
	36	96	22					20	64	85
	68	76	102					77	139	110
								80	99	114
	60	41	219					5	63	110
	48	51	157					5	36	229
								92	39	186
	44	102	168					136	110	145
	64	15	128					66	73	42
	41	85	48					63	69	135
	24	81	107					52	107	65
	54	48	191					26	48	216
	41	182	87					135	156	108
	62	176	94					63	79	185
	54	88	108
	60	129	90					50	66	59
	38	62	202					48	152	86
	7	62	-51					28	17	49
	26	102	106					44	74	45
	42	133	105					72	72	43
	21	43	111					12	54	148
	40	190	65
	56	83	179					34	58	166
	54	105	162					79	98	70
	27	12	166					28	35	120
	0	160	-9					107	26	243
								66	142	124
	18	39	181					39	52	191
Average	42.4	93.48	113.28				Average	57.3846	77	125.538
Standard error	19.1812	52.4008	65.6477				Standard error	34.9881	38.4229	60.7955
Standard deviation	3.83623	10.4802	13.1295				Standard deviation	6.86173	7.53535	11.923
Figure 6 supplement to figure 2C
	Pbdb split >Kir Average	Pbdb split >Kir SE
	0.536367	0.0537344
	0.544183	0.0586194
	0.481656	0.0488495
	0.36344	0.0166088
	0.453323	0.0566654
	0.345366	0.0532459
	0.532459	0.24327
	0.571539	0.0840211
	0.52904	0.193932
	0.493868	0.0718088
	0.456254	0.099653
	0.766449	0.0835326
	2.00527	0.0415221
	1.82257	0.049338
	1.74832	0.0923255
	1.72976	0.0288212
	1.59152	0.0244247
	1.54462	0.0547114
	1.37804	0.0893946
	1.17776	0.0718088
	1.16262	0.0703433
	1.01998	0.173904
	0.942795	0.0889061
	0.819206	0.148014
	0.805528	0.147037
	0.75619	0.0371256
	0.83093	0.120658
	1.01705	0.0693663
	1.06443	0.0972105
	1.05564	0.00635043
	1.21391	0.0591079
	1.28865	0.0488495
	1.35948	0.0337061
	1.53339	0.0718088
	1.47623	0.103561
	1.70973	0.0449415
	1.93884	0.044453
	1.29012	0.0542229
	0.915439	0.212984
	0.733231	0.163646
	0.812856	0.251086
	0.813344	0.046407
	0.734696	0.104538
	0.752771	0.110888
	0.662399	0.0234478
	0.900296	0.044453
	0.707341	0.094768
	0.611107	0.129451
Figure 6 supplement to figure 2D
	MB122B >Kir Average	MB122B >Kir SE
	0.450356	0.169255
	0.557253	0.0821528
	0.580019	0.023755
	0.471141	0.28506
	0.451345	0.130653
	0.536468	0.104918
	0.452335	0.0900711
	0.388989	0.234581
	0.506774	0.251407
	0.515682	0.0801732
	0.681967	0.230622
	0.722549	0.0910609
	2.52496	0.119765
	2.25079	0.130653
	2.14488	0.1455
	1.9875	0.00593876
	1.69057	0.0930405
	1.57377	0.057408
	1.43916	0.00989793
	1.21843	0.262295
	0.849242	0.176183
	0.781936	0.14451
	0.673059	0.158367
	0.599814	0.00395917
	0.632478	0.0564182
	0.862109	0.00692855
	0.831426	0.0158367
	0.806681	0.0346427
	1.14816	0.136591
	1.30851	0.233591
	1.25209	0.0326632
	1.32335	0.109867
	1.28079	0.0831426
	1.42926	0.0494896
	1.40254	0.167275
	1.47083	0.0395917
	1.53814	0.00395917
	0.910609	0.170244
	0.939313	0.0366223
	0.819548	0.0158367
	0.662171	0.226663
	0.822518	0.125704
	0.651284	0.118775
	0.648314	0.0643365
	0.708692	0.162326
	0.937334	0.076214
	0.941293	0.165295
	0.623569	0.488958
Figure 6 supplement to figure 2E
		MB122B > Kir		pBDP > Kir
	Time(ZT)	Mean	SE	Mean	SE
	0	1.438	0.447	0.706	0.254
	0.5	0.938	0.68	0	0
	1	0	0	0	0
	1.5	1.188	1.188	0.176	0.128
	2	0.875	0.752	0.941	0.694
	2.5	3.438	1.372	0.765	0.525
	3	8.875	2.436	2.529	0.967
	3.5	10.813	2.315	5.529	2.427
	4	10.5	2.633	6.529	1.815
	4.5	18.188	2.75	7.412	1.939
	5	18	2.55	11.706	2.551
	5.5	20.688	2.628	16.529	2.814
	6	20.813	2.63	12.706	2.572
	6.5	23.563	2.32	15.412	2.907
	7	15.188	2.67	17.529	2.777
	7.5	18.188	2.613	12.353	2.877
	8	13.563	2.84	10.118	2.782
	8.5	9.5	2.661	7.529	2.347
	9	8.563	1.994	7.412	2.439
	9.5	9.375	2.309	6.294	2.308
	10	9.125	1.871	2.882	1.691
	10.5	9.188	2.29	1.176	0.912
	11	5.5	1.734	1.353	0.618
	11.5	5.375	1.366	1.118	1.118
	12	7.313	1.494	6.471	1.921
	12.5	13.625	2.825	13.235	2.919
	13	10.875	1.972	16.647	2.942
	13.5	16	2.751	20.353	2.069
	14	15.188	2.871	17.059	2.455
	14.5	13.875	2.437	21.118	2.71
	15	14.625	2.24	18.529	2.922
	15.5	14.063	2.342	18.588	2.409
	16	13.75	2.73	17.235	2.715
	16.5	14.375	2.399	15.824	2.717
	17	15.25	2.782	18.294	2.772
	17.5	15.875	2.769	17.765	2.743
	18	19.375	2.315	22.294	2.171
	18.5	18.375	2.587	15.118	2.979
	19	21.813	2.608	17.882	2.985
	19.5	19.5	2.689	22	2.145
	20	18.875	2.947	22.471	2.583
	20.5	12.5	2.827	22.588	2.116
	21	18.313	2.703	20.706	2.685
	21.5	16.438	2.834	16.294	2.948
	22	20	2.679	15.412	3.039
	22.5	17.813	2.249	15.941	2.916
	23	15.125	2.825	20.471	2.835
	23.5	15.313	2.287	18.588	2.55
