# Supplementary material for: Circadian programming of the ellipsoid body sleep homeostat in Drosophila
Source: eLife. 2022 Jun 23;11:e74327. doi: 10.7554/eLife.74327 (PMC9270026; doi:10.7554/eLife.74327)
Supplement: Figure 6—source data 1. [file elife-74327-fig6-data1.xlsx]

## Sheet: Figure 
Figure 6A
ZT1.5							ZT9.5
	Sleep lost	Baseline sleep	Sleep gain					Sleep lost	Baseline sleep	Sleep gain		Omitted values represent flies that were not sleep deprived >90% of baseline sleep (see methods)
	20	45	114					47	33	60
	57	72	148					48	163	-31
	71	98	172					77	112	48
	22	19	91					41	0	59
	4	23	197					40	88	98
	12	11	173					16	0	51
	62	107	91					110	95	61
	40	0	88					9	22	67
	55	0	0					18	47	44
	17	0	41					5	0	41
	50	54	169					103	92	-7
	35	0	106					14	77	-28
	22	141	19					83	99	13
	0	42	61					71	134	-39
	53	60	133					49	106	27
	31	0	155					0	0	62
	53	43	125					18	40	35
	61	2	115					30	97	-21
	61	126	-46					58	9	64
	43	0	33					0	0	16
	54	17	82					47	51	8
	0	5	178					0	56	-8
	53	0	178					52	95	-29
	45	62	105					67	94	-25
	54	8	156					26	98	-32
	44	6	32					67	14	26
Average	39.1923	36.1923	104.462				Average	42.1538	62.3846	21.5385
Standard error	20.8193	42.5977	63.1242				Standard error	31.3684	47.4764	39.3571
Standard deviation	4.08299	8.35409	12.3797				Standard deviation	6.15185	9.31088	7.71856
Figure 6B
ZT1.5							ZT10.5
	Sleep lost	Baseline sleep	Sleep gain					Sleep lost	Baseline sleep	Sleep gain		Omitted values represent flies that were not sleep deprived >90% of baseline sleep (see methods)
	27	162	108					17	97	40
	47	84	79					13	126	50
	46	43	165
	0	164	86					18	134	68
	39	123	143					19	167	33
	44	118	110					42	101	82
	44	66	180					1	114	90
	60	64	199
	14	224	5					0	0	21
	60	142	121					44	116	48
	6	103	167					25	139	26
	60	173	96					21	157	8
								13	87	16
	46	11	82					14	77	56
	61	95	174					10	99	44
	34	76	182					75	149	48
	35	67	186					0	71	50
	51	162	108					100	41	152
								26	93	-15
	39	109	94					25	141	1
	66	95	95					45	91	71
								28	116	47
								29	177	9
	50	153	91
	37	34	213					14	157	-87
	60	40	98					13	108	8
								12	139	-33
Average	42.0909	104.909	126.455				Average	25.1667	112.375	34.7083
Standard error	17.819	53.9064	50.9666				Standard error	23.0871	40.7162	46.0269
Standard deviation	3.79901	11.4929	10.8661				Standard deviation	4.71264	8.31116	9.3952
Figure 6C
ZT1.5							ZT9.5
	Sleep lost	Baseline sleep	Sleep gain					Sleep lost	Baseline sleep	Sleep gain		Omitted values represent flies that were not sleep deprived >90% of baseline sleep (see methods)
	44	13	230					12	34	207
	46	43	55					10	28	217
	49	28	126					37	2	255
	59	139	115					129	144	65
	60	75	131					100	52	207
	60	23	215
	30	0	226					42	104	154
	24	147	122					53	66	162
	37	59	210					47	0	262
	61	5	240					0	101	129
	61	60	202					37	32	225
	51	92	123					18	76	111
	62	88	178					121	111	134
	43	114	139					28	110	82
	68	149	113
	59	62	14					68	71	12
	36	116	142
	53	45	225					5	96	-4
	45	186	83					84	93	117
	52	6	245
	59	25	38					31	30	59
	48	45	216					76	66	149
	38	10	92					21	61	102
	32	14	188					20	26	97
	29	50	213					56	101	167
	48	77	191					136	52	213
	4	40	82					50	55	149
	33	33	232					62	134	122
Average	46.1071	62.2857	156.643				Average	51.7917	68.5417	141.375
Standard error	14.4436	50.1079	66.9296				Standard error	39.0295	39.3822	70.6829
Standard deviation	2.72958	9.46951	12.6485				Standard deviation	7.96687	8.03885	14.4281
Figure 6D
	pBDP split > hid	MB122B > +	MB122B > hid
	75		207
	48	37	217
	17	66	255
	57	10	65
		86	207
	-9	107
	82	56	154
	72		162
	41	60	262
	-4		129
	58	0
	4	64	225
	111	79	111
	25	107	134
	15	43	82
	43
	11	50	12
		56
	65	104	-4
		11	117
	85
	15	49
	12
	31	81	59
	19		149
	22	69	102
	50	129	97
	45		167
	61	111	213
	57		149
		88	122
	87
Figure 6E
	pBDP split > hid	MB122B > +	MB122B > hid
	114		230
	148	108	55
	172	79	126
	91	165	115
	197	86	131
	173	143	215
	91	110	226
	88		122
		180	210
	0	199	240
	41	5
	169	121	202
	106	167	123
	19	96	178
	61		139
	133		113
	155	82
	125	174	142
	115	182	225
	-46	186	83
	33		245
	82	108
	178
	178	94	38
	105	95	216
	156		92
	32		188
		91	213
			191
		98	82
			232
Figure 6F
	pBDP split>HID Average	pBDP split>HID SE
	0.49495	0.0687782
	0.574277	0.0654026
	0.570057	0.0991587
	0.387352	0.0303805
	0.490308	0.0447269
	0.376381	0.115615
	0.452333	0.0346001
	0.582716	0.290725
	0.654026	0.00843904
	0.716053	0.104222
	0.662887	0.0333342
	0.624911	0.108442
	1.92579	0.0362879
	1.77135	0.00675123
	1.73043	0.044305
	1.58992	0.0430391
	1.46333	0.0396635
	1.40805	0.00801709
	1.40805	0.0417733
	1.16501	0.0856563
	1.1321	0.0113927
	1.09665	0.0206757
	1.02914	0.0417733
	0.930404	0.0248952
	0.906353	0.0472586
	0.954034	0.110973
	0.868799	0.0485245
	0.949392	0.043883
	0.952768	0.128273
	0.997917	0.0198317
	1.09581	0.0426172
	1.25109	0.0206757
	1.34856	0.0219415
	1.37472	0.00253171
	1.54603	0.0447269
	1.60004	0.105488
	1.93634	0.0670904
	0.956565	0.0763733
	0.859094	0.172156
	0.762045	0.0160342
	0.643477	0.112661
	0.764999	0.0232074
	0.919012	0.0911416
	0.900446	0.102956
	0.898336	0.0510562
	0.742214	0.129539
	0.773438	0.202115
	0.762045	0.135869
Figure 6G
	MB122B>+ Average	MB122B>+ SE
	0.423943	0.0328638
	0.229225	0.0944833
	0.521712	0.0501172
	0.315492	0.00821594
	0.497886	0.0164319
	0.885679	0.0969481
	0.573473	0.147887
	0.440375	0.0953049
	0.400116	0.137206
	0.548003	0.0895538
	0.476525	0.060798
	0.655632	0.0476525
	2.57405	0.0632628
	2.09671	0.0706571
	1.86338	0.0542252
	1.86666	0.026291
	1.68509	0.163497
	1.61032	0.138028
	1.29812	0.101878
	1.09847	0.191431
	0.827345	0.0944833
	0.598942	0.0862674
	0.526642	0.142136
	0.482276	0.0714787
	0.600585	0.0517604
	0.575116	0.0312206
	0.990021	0.114202
	0.991664	0.0764083
	1.1568	0.0723003
	1.28497	0.0903754
	1.45094	0.0591548
	1.52077	0.0238262
	1.54788	0.0328638
	1.70399	0.10845
	1.81901	0.0312206
	2.03016	0.0451877
	2.32429	0.125704
	0.492135	0.0172535
	0.58251	0.0534036
	0.483919	0.155281
	0.423121	0.275234
	0.555398	0.00328638
	0.790374	0.123239
	0.830632	0.224295
	0.925937	0.0205399
	0.924294	0.0402581
	0.921829	0.162676
	0.577581	0.030399
Figure 6H
	MB122B >HID Average	MB122B >HID SE
	0.460272	0.0750799
	0.563099	0.107179
	0.37812	0.133294
	0.295423	0.113708
	0.255163	0.0527736
	0.283454	0.0266588
	0.431982	0.0359078
	0.552218	0.127853
	0.513046	0.0821527
	0.47605	0.143087
	0.56854	0.218167
	0.853626	0.0386281
	2.39168	0.094666
	2.06361	0.101739
	2.11312	0.327522
	1.93412	0.121325
	1.70834	0.179539
	1.71977	0.169202
	1.7214	0.293791
	1.414	0.208374
	1.42652	0.120781
	1.24045	0.122957
	0.965158	0.301408
	0.949924	0.303584
	0.847097	0.200757
	0.738286	0.162673
	0.820982	0.0941219
	0.975495	0.057126
	1.08757	0.200757
	1.24916	0.121869
	1.26602	0.0310113
	1.39115	0.0277469
	1.32913	0.0560379
	1.3003	0.0152336
	1.4004	0.0837848
	1.39551	0.161585
	1.7992	0.13547
	0.950468	0.00598463
	0.823159	0.126765
	0.649604	0.00435246
	0.501077	0.0255707
	0.633827	0.0179539
	0.609888	0.0179539
	0.783987	0.0516854
	0.456464	0.0701834
	0.531544	0.0843289
	0.586494	0.0685512
	0.594111	0.119693
Figure 6I
		MB122B > HID		pBDP SPLIT > HID		MB122B > +
	Time (ZT)	Mean	SE	Mean	SE	Mean	SE
	0	0.455	0.247	0.556	0.242	0.47619	0.163577
	0.5	0	0	0	0	0.904762	0.696607
	1	0.545	0.545	0	0	1.42857	0.887939
	1.5	0.727	0.727	1.111	1.111	1.19048	0.735556
	2	1.273	0.864	2.556	1.923	4	1.51028
	2.5	3.545	2.379	3.111	1.662	3.2381	1.24385
	3	3	1.945	2.889	2.239	6.85714	1.75294
	3.5	6.636	2.774	8.889	4.231	12.381	2.36188
	4	7.091	2.794	5.556	3.379	16.4762	2.08922
	4.5	6.364	2.086	12.333	4.595	21	2.31969
	5	9.636	3.517	9.889	4.022	23.619	1.60576
	5.5	10.091	3.198	12.111	3.569	23.1429	2.20204
	6	10	3.552	8.778	3.919	22.7143	1.95806
	6.5	10.545	4.117	16.667	4.23	23.5238	2.09605
	7	11.091	3.569	14.889	3.381	16.4286	2.0994
	7.5	4.455	2.823	10.556	3.888	12	2.30424
	8	8.182	3.115	6.667	2.698	9.04762	1.87525
	8.5	10.091	2.862	6.111	2.579	7.7619	1.99393
	9	6.182	2.14	5.778	2.608	4.47619	1.30314
	9.5	3.364	1.37	0.667	0.667	2.33333	1.23314
	10	2.727	1.83	1.667	1.13	2.66667	0.918937
	10.5	1.545	1.139	0.778	0.778	1.7619	1.09524
	11	3.091	2.078	0	0	1.95238	1.10081
	11.5	0.545	0.545	1.222	1.222	0.904762	0.904762
	12	1.909	1.04	3	2.121	7.71429	1.18752
	12.5	10.636	3.666	11.333	4.045	23.3333	1.9078
	13	12.727	3.936	16.667	4.543	21.6667	2.49698
	13.5	14	3.868	22.222	2.727	22.381	2.17286
	14	20.455	2.971	21.889	3.626	22.2381	1.74425
	14.5	19.182	3.67	22.111	3.47	22.9048	1.911
	15	21.545	3.388	21.444	3.571	20.0952	1.83083
	15.5	15.455	3.627	20.333	2.759	18.9524	2.51043
	16	22	2.128	23.556	3.228	17.7143	2.63054
	16.5	15.091	3.285	23.333	2.357	19.9048	2.05624
	17	16.455	2.943	17.667	3.621	20.3333	2.47495
	17.5	16.727	3.078	16.222	4.475	23.3333	1.99682
	18	21.455	2.574	14.444	3.262	20.1429	2.10134
	18.5	18.455	3.538	25.889	2.48	20.4286	1.97794
	19	17.273	3.868	29.222	0.434	20.381	2.19249
	19.5	22.182	1.953	26.556	1.582	21.5238	2.26844
	20	20.636	3.123	26.111	2.091	26.2857	1.07381
	20.5	21.091	3.265	27.333	1.404	22	1.99643
	21	13.727	3.267	23	2.672	16.381	2.43924
	21.5	13.455	3.271	27	0.833	15.4286	2.6953
	22	16.364	3.948	22.444	3.512	18.9524	2.1106
	22.5	19.364	3.614	22.778	3.463	23.5238	2.11865
	23	22.909	3.204	14	3.629	22.8571	2.14841
	23.5	25	1.907	14.889	4.82	19.2857	2.35245
