# Supplementary material for: Circadian programming of the ellipsoid body sleep homeostat in Drosophila
Source: eLife. 2022 Jun 23;11:e74327. doi: 10.7554/eLife.74327 (PMC9270026; doi:10.7554/eLife.74327)
Supplement: Figure 7—figure supplement 1—source data 1. [file elife-74327-fig7-figsupp1-data1.xlsx]

## Sheet: Figure 7 supplement 1
Figure 7 supplement to figure 1A
PPM3 > TNTi	R5 split> TNTi	dFB > TNTi		PPM3 > TNTa	R5 split> TNTa	dFB split> TNTa		Omitted values represent flies that were not sleep deprived >90% of baseline sleep (see methods)
140	9	62
150	214	110			-33	-42
127	61	144			68	9
168	80	81			55	22
133	55	100		37	108	28
176		185		20	172	155
157	12	49		143	-109	-49
166		61				26
67	130	115		31	17	-74
159		17			27
72	161	14			57	-1
45	78	22			-59	-20
	40	32		-5	42	66
148	-23	114		76	71	154
126	88	38		-9	21
165	188	62
165	101	172		63	91
69	191				96
	158	209			105
53	134	204			63
79	142	105			-6
67	166	111		-56
197	188	126		24
5		173		-6
43	80	92		66
87	177	115		48
-33	170	157
90	175	146
164	120	25
87	140			98
52	183
159	55
191	188
101	189
185	247
	169
161	226
206	142
78	164
108	176
162	193
117	165
221
154
151
-62
Figure 7 supplement to figure 1B
PPM3 > TNTi	R5 split> TNTi	dFB > TNTi		PPM3 > TNTa	R5 split> TNTa	dFB split> TNTa		Omitted values represent flies that were not sleep deprived >90% of baseline sleep (see methods)
101	25	74				-21
34	133	115		27		-19
56	64	44			-11	-81
46	65	57			-28	-24
152		51		38	-14	-31
31		93		-39	41	56
112	-3	50			-81	-33
		61				23
-7	2	63		11		-46
64		-9		-49	-50
14	68	18			-39
11	88	11			16	4
	24	109		21	-25	20
26	45	14			35	77
46	34	57		-51	-27
84	47	90		-4
56	121	67		9	-55
35	26				86
	26				-18
42	18	29			33
57	77	96			-48
37		102		-145
	74	40		-23
59		146		55
38	-18	10		33
45		82
-2	106	38
	4	59
42	31	24
25	51
	78
22	135
41	29
69	85
46	133
	105
	114
67	91
	-4
29	-19
34	130
50	87
51	51
69	69
11	11
