# Supplementary material for: Circadian programming of the ellipsoid body sleep homeostat in Drosophila
Source: eLife. 2022 Jun 23;11:e74327. doi: 10.7554/eLife.74327 (PMC9270026; doi:10.7554/eLife.74327)
Supplement: Figure 7—figure supplement 2—source data 1. [file elife-74327-fig7-figsupp2-data1.xlsx]

## Sheet: Sheet1
Figure 7C
ZT1.5							ZT9.5
	Sleep lost	Baseline sleep	Sleep gain					Sleep lost	Baseline sleep	Sleep gain		Omitted values represent flies that were not sleep deprived >90% of baseline sleep (see methods)
	0	0	140					34	10	76
	50	0	150					72	56	22
	32	0	127					23	67	-30
	55	87	168					72	66	42
	53	0	133					10	39	75
	2	78	176					65	41	16
	60	28	157					12	11	62
	57	40	166
	67	0	67					3	18	-10
	71	25	159					64	45	28
	13	0	72					33	0	34
	62	19	45					6	0	8
	26	18	148					44	73	-44
	58	33	126					0	22	30
	58	54	165					54	64	69
	18	0	165					114	20	79
	35	44	69					57	0	66
	32	10	53					26	18	12
	29	13	79					18	14	60
	35	14	67					70	54	5
	66	38	197					30	91	36
	10	5	5					0	18	15
	62	6	43					21	36	20
	31	19	87					15	27	36
	41	70	-33
	63	0	90					37	56	-20
	62	18	164					51	16	37
	62	0	87					87	61	5
	62	32	52
	56	51	159					24	57	20
	60	0	191					31	63	-31
	61	0	101					0	31	34
	56	16	185					57	37	37
	25	0	161					0	25	39
	62	20	206					42	58	58
	58	10	78
	61	32	108					27	76	-24
	62	10	162					103	54	29
	55	50	117					44	56	35
	62	0	221					11	57	17
	60	0	154					0	53	1
	53	17	151					113	61	70
	79	138	-62					43	71	-42
Average	48.4186	23.1395	117.581				Average	38.7949	41.5897	24.9231
Standard error	19.4829	28.9323	62.9396				Standard error	31.5062	24.0435	33.1935
Standard deviation	2.97111	4.41213	9.5982				Standard deviation	5.04503	3.85004	5.31522
Figure 7B
ZT1.5							ZT9.5
	Sleep lost	Baseline sleep	Sleep gain					Sleep lost	Baseline sleep	Sleep gain		Omitted values represent flies that were not sleep deprived >90% of baseline sleep (see methods)
	37	8	37
	40	100	20					0	0	16
	50	69	143					107	117	-74
								15	37	58
	62	21	31
	60	124	-5					83	73	-73
	114	133	76					16	69	-31
	128	130	-9					62	106	-21
								51	141	-61
	94	86	63					59	11	25
								37	70	16
								30	0	0
								93	105	21
	123	182	-56
	50	40	24					113	189	-127
	62	112	-6					14	54	-53
	68	34	66
	82	42	48					45	58	-41
Average	64.6983	72.1206	28.8035				Average	51.7857	73.5714	-21.5351
Standard error	38.879	56.5653	47.0512				Standard error	36.2771	54.4436	47.6578
Standard deviation	10.0385	14.6051	12.1486				Standard deviation	9.69546	14.5507	11.9144
