# Supplementary material for: Circadian programming of the ellipsoid body sleep homeostat in Drosophila
Source: eLife. 2022 Jun 23;11:e74327. doi: 10.7554/eLife.74327 (PMC9270026; doi:10.7554/eLife.74327)
Supplement: Figure 7—source data 1. [file elife-74327-fig7-data1.xlsx]

## Sheet: Figure 7
Figure 7C
ZT1.5							ZT8.5
	Sleep lost	Baseline sleep	Sleep gain					Sleep lost	Baseline sleep	Sleep gain		Omitted values represent flies that were not sleep deprived >90% of baseline sleep (see methods)
	0	0	140					27	12	101
	50	0	150					86	18	34
	32	0	127					43	13	56
	55	87	168					94	45	46
	53	0	133					10	2	152
	2	78	176					98	31	31
	60	28	157					26	12	112
	57	40	166
	67	0	67					12	12	-7
	71	25	159					68	40	64
	13	0	72					0	33	14
	62	19	45					37	6	11
	26	18	148					82	49	26
	58	33	126					44	0	46
	58	54	165					93	42	84
	18	0	165					79	54	56
	35	44	69					99	11	35
	32	10	53					51	5	42
	29	13	79					39	7	57
	35	14	67					57	34	37
	66	38	197
	10	5	5					0	6	59
	62	6	43					6	21	38
	31	19	87					32	33	45
	41	70	-33					54	37	-2
	63	0	90
	62	18	164					85	13	42
	62	0	87					80	33	25
	62	32	52
	56	51	159					83	24	22
	60	0	191					62	18	41
	61	0	101					0	15	69
	56	16	185					67	25	46
	25	0	161
	62	20	206					59	24	67
	58	10	78
	61	32	108					34	35	29
	62	10	162					111	53	34
	55	50	117					74	25	50
	62	0	221					7	10	51
	60	0	154					0	25	69
	53	17	151
	79	138	-62					61	47	11
Average	48.4186	23.1395	117.581				Average	51.6667	24.1667	47.0278
Standard error	19.4829	28.9323	62.9396				Standard error	33.3706	15.2681	30.9409
Standard deviation	2.97111	4.41213	9.5982				Standard deviation	5.56177	2.54468	5.15682
Figure 7D
ZT1.5							ZT8.5
	Sleep lost	Baseline sleep	Sleep gain					Sleep lost	Baseline sleep	Sleep gain		Omitted values represent flies that were not sleep deprived >90% of baseline sleep (see methods)
								0	15	27
	37	8	37					0	0	38
	40	100	20					0	93	-39
	50	69	143
	62	21	31					0	13	11
								1	136	-49
	60	124	-5					0	27	21
	114	133	76
	128	130	-9					0	101	-51
								0	51	-4
	94	86	63					5	28	9
	123	182	-56					0	157	-145
	50	40	24					0	55	-23
	62	112	-6					6	16	55
	68	34	66					0	6	33
	82	42	48
Average	64.6983	72.1206	28.8035				Average	0.923077	53.6923	-9
Standard error	38.879	56.5653	47.0512				Standard error	2.06	51.9156	53.2056
Standard deviation	10.0385	14.6051	12.1486				Standard deviation	0.571341	14.3988	14.7566
Figure 7E
ZT1.5							ZT9.5
	Sleep lost	Baseline sleep	Sleep gain					Sleep lost	Baseline sleep	Sleep gain		Omitted values represent flies that were not sleep deprived >90% of baseline sleep (see methods)
	41	0	9					20	24	25
	68	31	214					27	71	133
	65	0	61					8	9	64
	1	28	80					5	0	65
	41	0	55
	52	19	12					0	21	-3
	63	23	130					68	95	2
	65	56	161					77	100	68
	49	51	78					31	80	88
	37	52	40					29	23	24
	56	159	-23					68	17	45
	49	98	88					81	88	34
	63	62	188					25	72	47
	63	81	101					57	24	121
	64	51	191					15	69	26
	62	34	158					126	55	26
	52	67	134					85	87	18
	61	83	142					73	100	77
	75	98	166
	67	6	188					55	56	74
	49	47	80					83	92	-18
	63	92	177
	63	46	170					60	36	106
	62	17	175					56	92	4
	55	128	120					91	80	31
	62	53	140					19	17	51
	63	49	183					72	51	78
	63	79	55					48	12	135
	98	73	188					57	70	29
	60	25	189					21	15	85
	55	15	247					17	16	133
	62	61	169					43	11	105
	65	43	226					47	94	114
	61	76	142					42	44	91
	61	102	164					140	98	-4
	13	18	176					47	80	-19
	62	75	193					54	77	130
	42	54	165					22	41	87
Average	56.6579	54	135.053				Average	50.5429	54.7714	59.2
Standard error	15.9022	36.033	64.6934				Standard error	32.3886	32.9555	46.1429
Standard deviation	2.57968	5.84533	10.4947				Standard deviation	5.47467	5.57049	7.79957
Figure 7F
ZT1.5							ZT8.5
	Sleep lost	Baseline sleep	Sleep gain					Sleep lost	Baseline sleep	Sleep gain		Omitted values represent flies that were not sleep deprived >90% of baseline sleep (see methods)
	102	258	-33
	53	73	68					48	16	75
	64	61	55					68	83	-5
	61	15	108					0	96	-30
	78	60	172					62	103	-14
	145	246	-109					146	205	-111
	42	70	17
	65	114	27					100	84	33
	68	148	57					117	133	48
	69	132	-59					72	49	36
	62	12	42					7	5	-5
	49	103	71					70	58	66
	53	8	21					24	0	24
	74	91	91
	69	156	96					103	89	59
	63	17	105					11	2	54
	74	45	63					29	55	37
	67	57	-6					40	33	-24
Average	69.8889	92.5556	43.6667				Average	59.8	67.4	16.2
Standard error	22.7748	73.5561	66.4503				Standard error	43.1082	55.6953	48.6374
Standard deviation	5.36808	17.3373	15.6625				Standard deviation	11.1305	14.3805	12.5581
Figure 7G
ZT1.5							ZT9.5
	Sleep lost	Baseline sleep	Sleep gain					Sleep lost	Baseline sleep	Sleep gain		Omitted values represent flies that were not sleep deprived >90% of baseline sleep (see methods)
	47	0	37					30	49	-19
	74	158	-50					54	140	-72
	27	27	211					0	32	-8
	47	154	62					98	11	74
	50	101	110					86	54	115
	45	95	144					85	55	44
	46	138	81					41	89	57
	31	70	100					54	46	51
	46	37	185					11	18	93
	16	39	49					27	45	50
	48	60	61					33	45	61
	34	117	115					46	77	63
	58	40	17					26	28	-9
	66	195	14					107	77	18
	26	162	22					74	38	11
	56	131	32					34	6	109
	33	114	114					68	46	14
	49	157	38					133	35	57
	61	126	62					87	64	90
	52	0	172					22	1	67
	44	61	209
	60	18	204					15	51	29
	9	13	105					0	29	96
	0	58	111					24	11	102
	61	35	126					57	11	40
	0	22	173					0	16	146
	29	8	92					0	26	10
	17	0	115					0	22	82
	30	17	157					15	9	38
	61	72	146					41	36	59
	34	114	25					50	64	24
Average	40.5484	75.4516	98.0323				Average	43.9333	41.0333	49.7333
Standard error	18.9558	57.9217	65.7954				Standard error	35.4128	29.4308	45.8167
Standard deviation	3.40456	10.403	11.8172				Standard deviation	6.46546	5.3733	8.36494
Figure 7H
ZT1.5							ZT9.5
	Sleep lost	Baseline sleep	Sleep gain					Sleep lost	Baseline sleep	Sleep gain		Omitted values represent flies that were not sleep deprived >90% of baseline sleep (see methods)
								26	113	-21
	15	77	-42					8	29	-19
	62	168	9					101	86	-81
	45	37	22					0	27	-24
	44	151	28					56	105	-31
	74	79	155					28	101	56
	52	126	-49					43	50	-33
	45	165	26					69	98	23
	32	173	-74					64	77	-46
	58	192	-1
	86	90	-20					77	11	4
	70	185	66					115	173	20
	61	5	154					41	17	77
Average	53.6667	120.667	22.8333				Average	52.3333	73.9167	-6.25
Standard error	19.2559	61.8522	72.5557				Standard error	35.08	48.4007	44.3604
Standard deviation	5.55869	17.8552	20.945				Standard deviation	10.1267	13.9721	12.8057
