# Supplementary material for: Circadian programming of the ellipsoid body sleep homeostat in Drosophila
Source: eLife. 2022 Jun 23;11:e74327. doi: 10.7554/eLife.74327 (PMC9270026; doi:10.7554/eLife.74327)
Supplement: Figure 8—source data 1. [file elife-74327-fig8-data1.xlsx]

## Sheet: Figure 7
Sequencing data have been deposited in GEO under accession code GSE186076
