# Supplementary material for: Circadian programming of the ellipsoid body sleep homeostat in Drosophila
Source: eLife. 2022 Jun 23;11:e74327. doi: 10.7554/eLife.74327 (PMC9270026; doi:10.7554/eLife.74327)
Supplement: Figure 9—source data 1. [file elife-74327-fig9-data1.xlsx]

## Sheet: Figure 8
Figure 9B
		1.5 cont	1.5 SD	9.5 cont	9.5 SD
		537.585	751.571	393.379	495.679
		731.836	498.22	349.958	243.387
		482.284	460.495	332.184	245.96
		399.604	430.805	336.794	348.947
		458.519	406.079	310.663	287.3
		553.952	468.169	278.146	345.668
		418.061	310.677	329.697	423.232
		503.147	612.216	250.212	363.438
		286.994	556.041	369.194	408.971
		615.999	418.508	442.245	249.733
		482.693	490.895	310.77	487.558
	Average	497.334	491.243	336.658	354.534
	STDEV	116.601	117.017	52.8321	92.2685
	SE	35.1565	35.2821	15.9295	27.82
		ZT1.5	ZT9.5
		359.961	327.094
		312.383	532.032
		247.283	562.418
		709.479	324.556
		521.947	266.281
		419.299	319.349
		543.901	261.813
		350.603	256.211
			535.599
			351.939
	Average	433.107	373.729
	STDEV	150.239	121.459
	SE	53.1175	38.4087
Figure 9C
		ZT1.5 control	ZT1.5 SD	ZT9.5 control	ZT9.5 SD
		0.785749	0.784194	0.643152	0.905064
		1.04755	0.860032	0.695695	0.852334
		0.843386	0.793216	1.0439	0.742396
		0.805815	0.999743	0.855481	0.965003
		0.820734	0.816775	1.08504	0.818659
		0.874119	0.989145	0.879506	0.960742
		0.748699	1.20554	0.654142	0.743096
		0.772063	1.06893	1.17079	0.891687
		0.779048	1.05321	0.722494	0.873419
		0.874781	1.06786	0.883359	0.981737
	Average	0.835194	0.963865	0.863355	0.873414
	STDEV	0.0858813	0.14298	0.187732	0.0860718
	SE	0.027158	0.0452142	0.0593659	0.0272183
