# Supplementary figures and images for: Circadian programming of the ellipsoid body sleep homeostat in Drosophila
Source: eLife journal article supplement (doi:10.7554/elife.74327), 2022-06-23

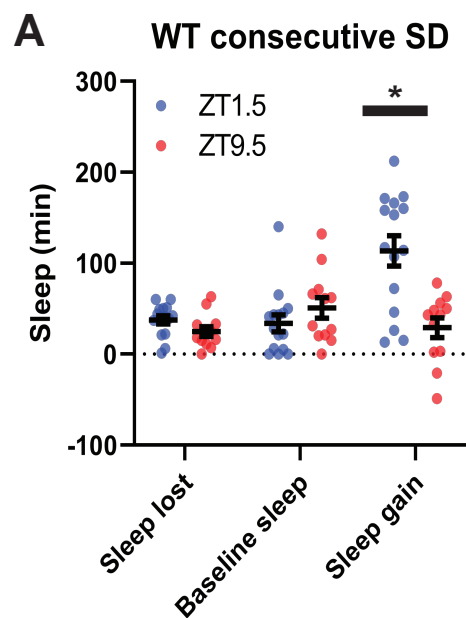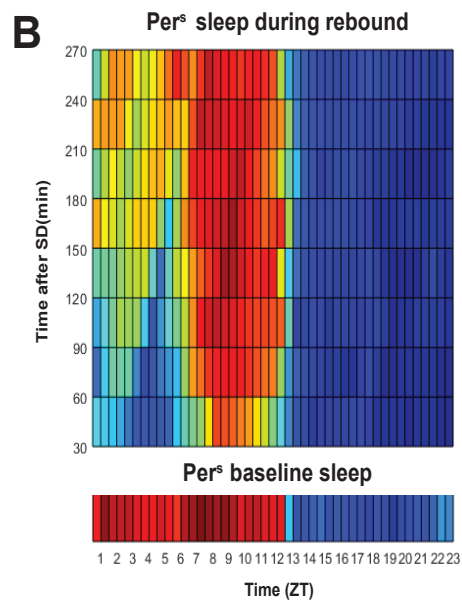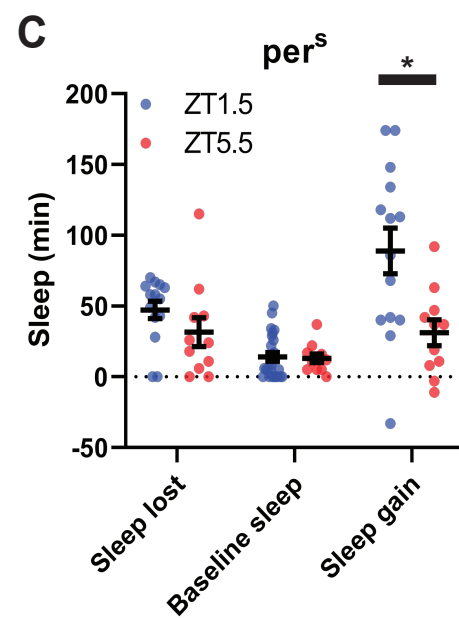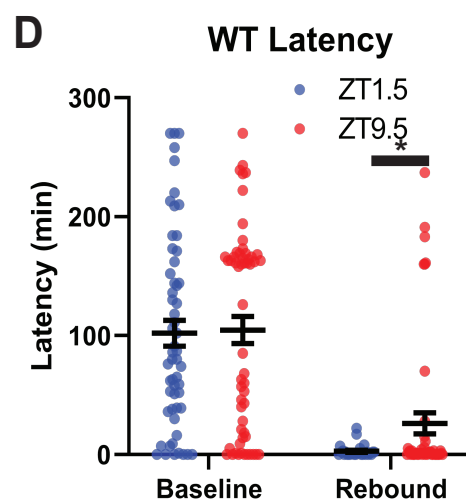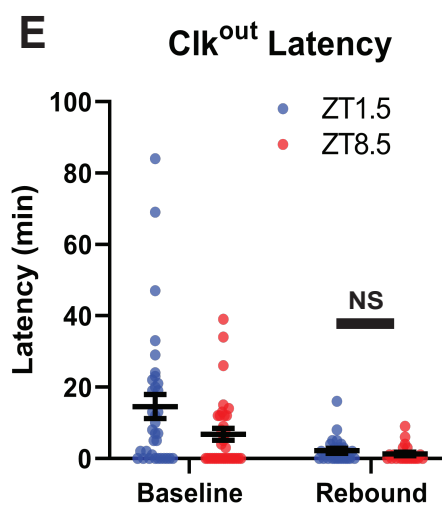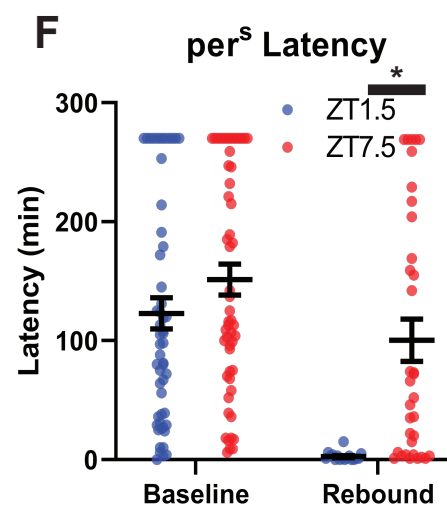

Supplement: supp [file elife_poa_e74327_Figure_2_figure_supplement_1.pdf › elife_poa_e74327_Figure_2_figure_supplement_1.pdf]

**A**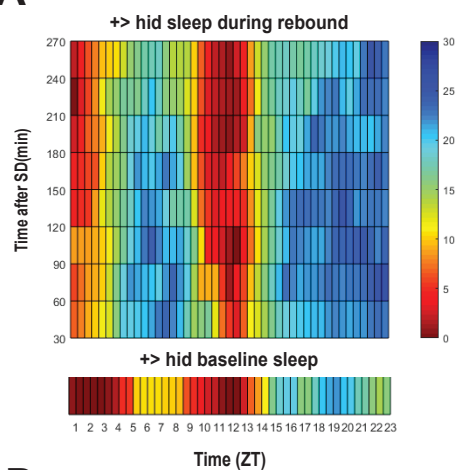**B**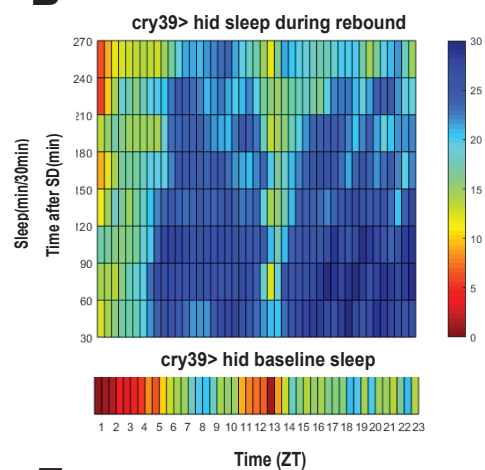**C**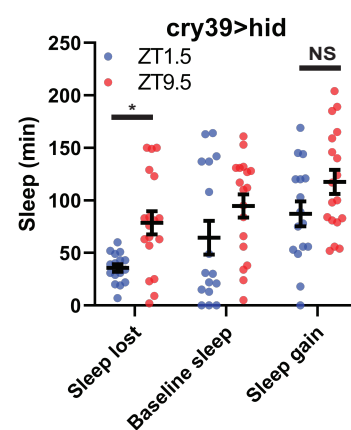**D**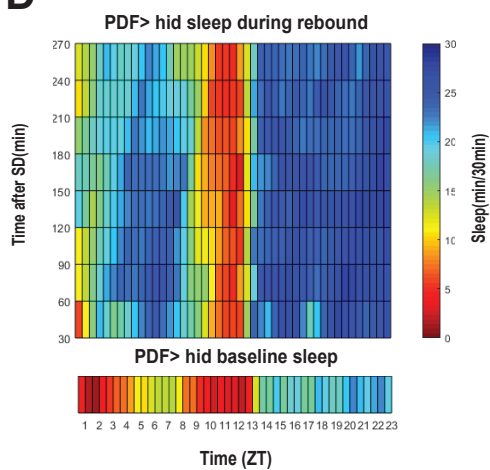**E**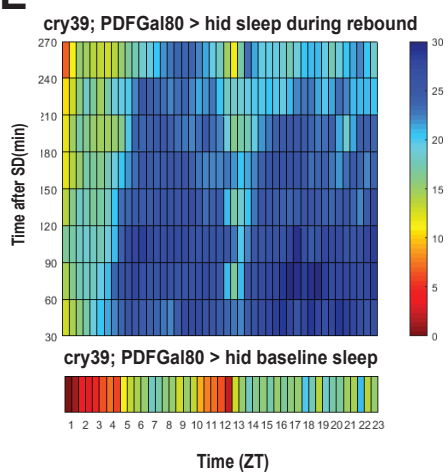**F**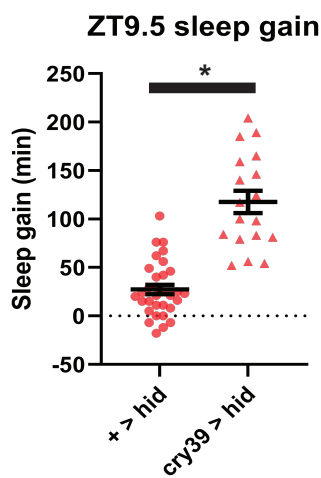

Supplement: supp [file elife_poa_e74327_Figure_3_figure_supplement_1.pdf › elife_poa_e74327_Figure_3_figure_supplement_1.pdf]

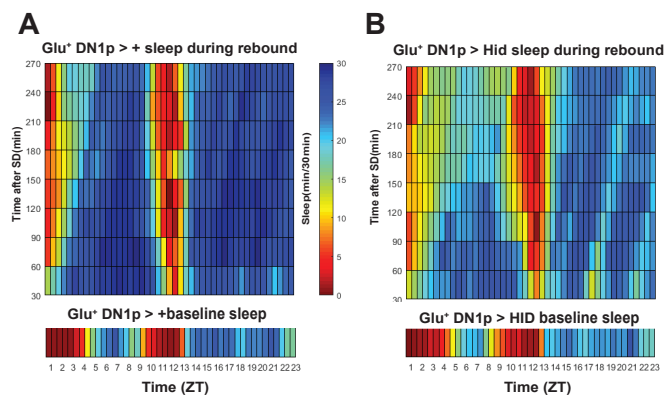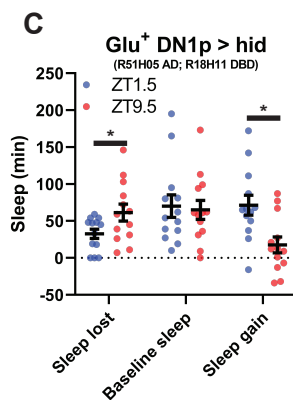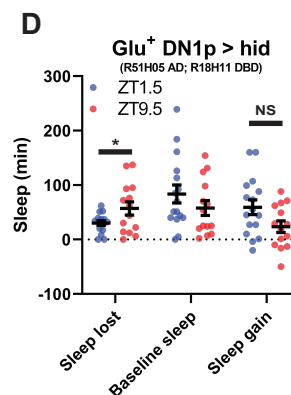

Supplement: supp [file elife_poa_e74327_Figure_4_figure_supplement_4.pdf › elife_poa_e74327_Figure_4_figure_supplement_4.pdf]

**A**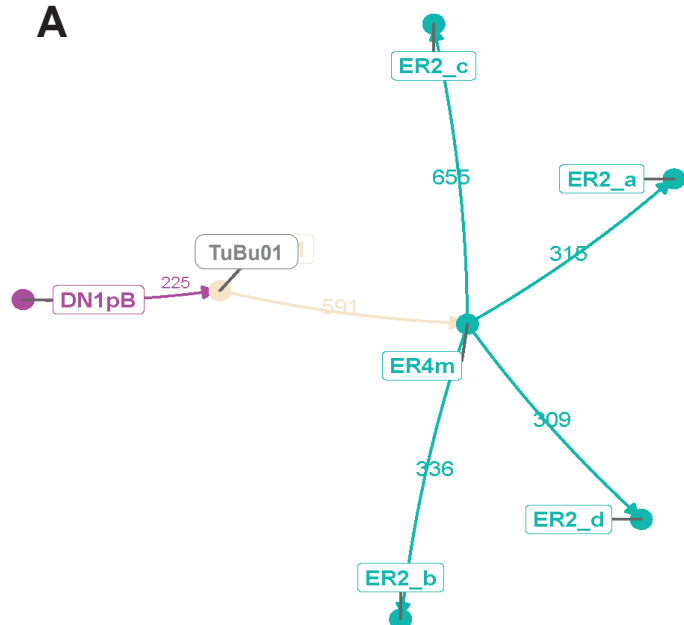**B**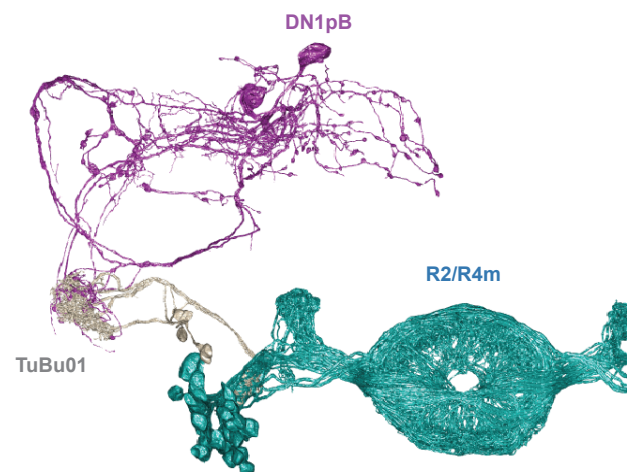**C**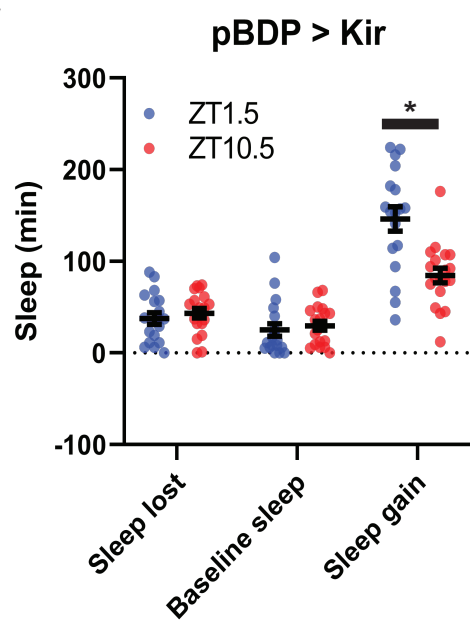**D**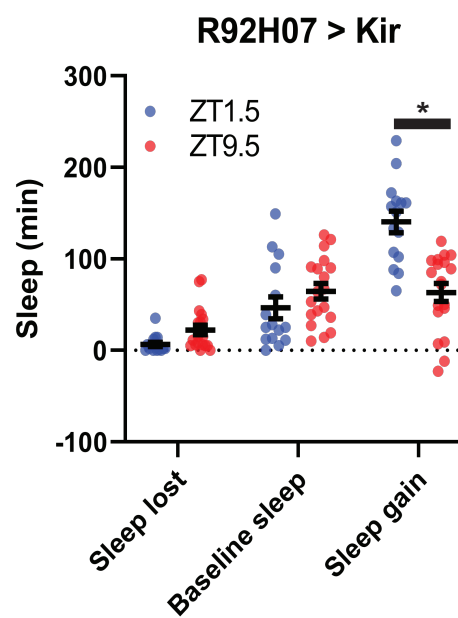

Supplement: supp [file elife_poa_e74327_Figure_5_figure_supplement_1.pdf › elife_poa_e74327_Figure_5_figure_supplement_1.pdf]

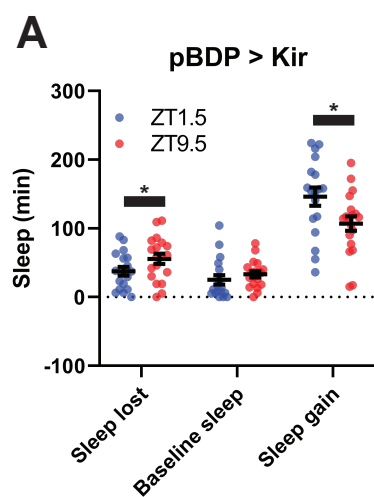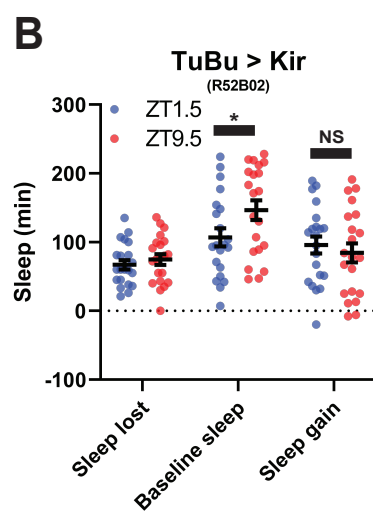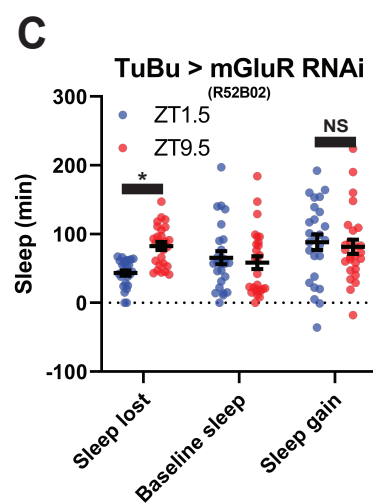

Supplement: supp [file elife_poa_e74327_Figure_5_figure_supplement_2.pdf › elife_poa_e74327_Figure_5_figure_supplement_2.pdf]

**A**

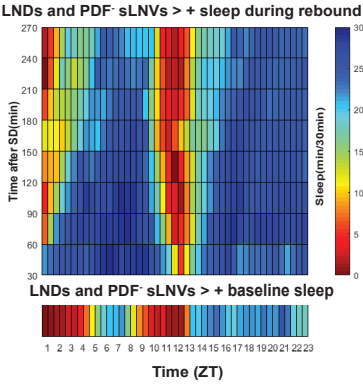

**B**

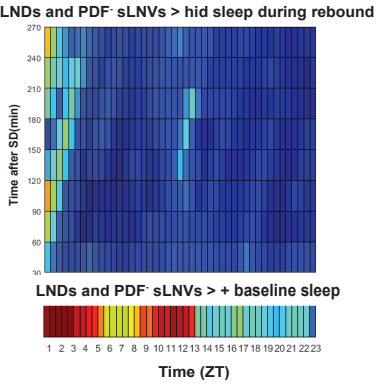

**C**

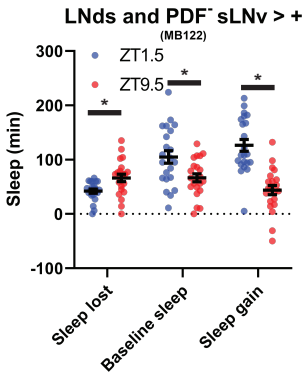

Supplement: supp [file elife_poa_e74327_Figure_6_figure_supplement_1.pdf › elife_poa_e74327_Figure_6_figure_supplement_1.pdf]

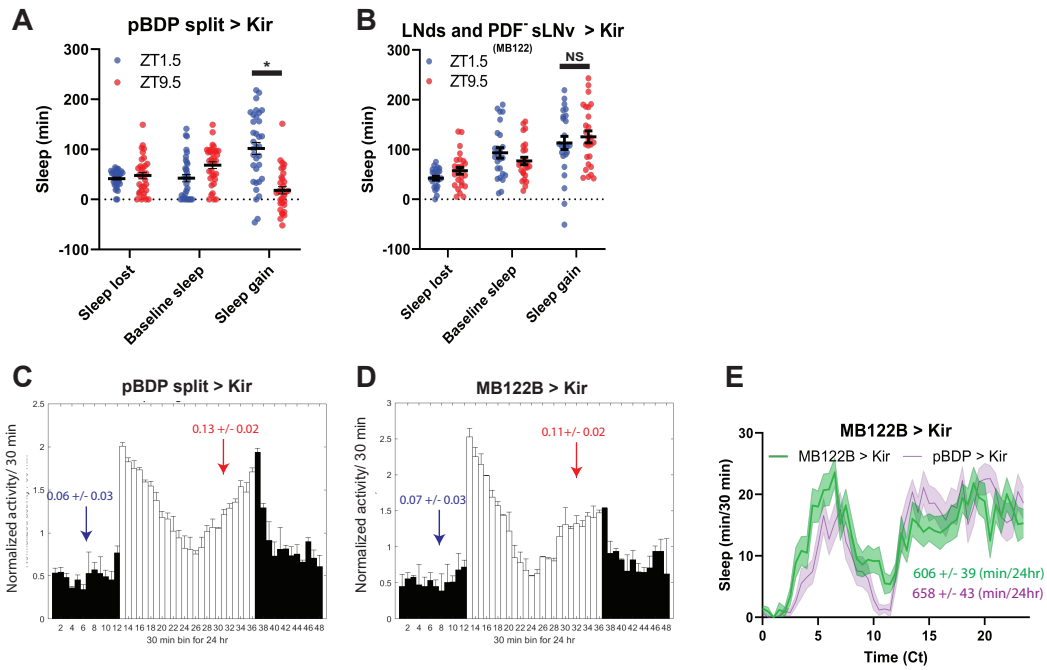

Supplement: supp [file elife_poa_e74327_Figure_6_figure_supplement_2.pdf › elife_poa_e74327_Figure_6_figure_supplement_2.pdf]

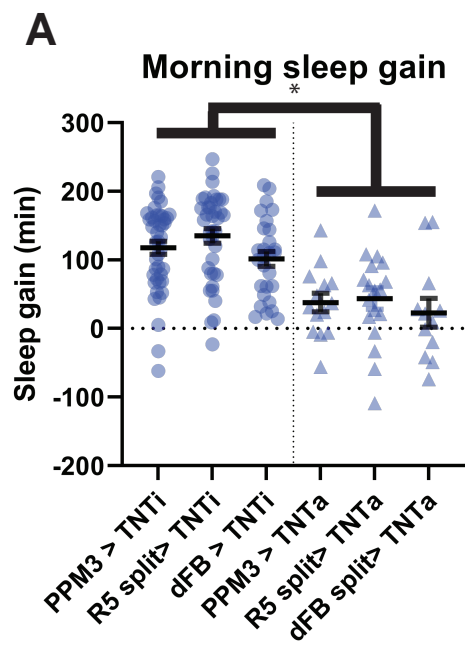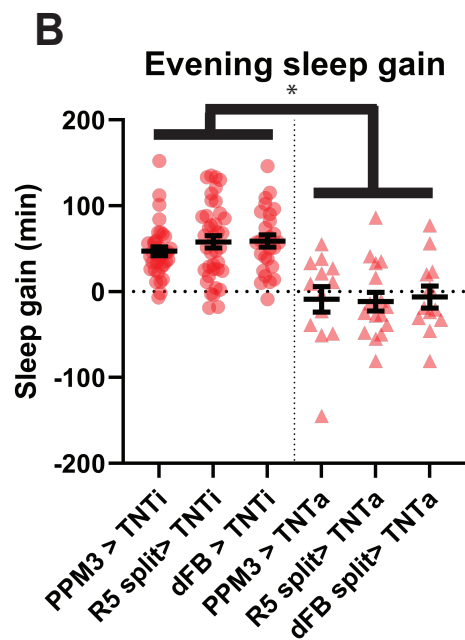

Supplement: supp [file elife_poa_e74327_Figure_7_figure_supplement_1.pdf › elife_poa_e74327_Figure_7_figure_supplement_1.pdf]

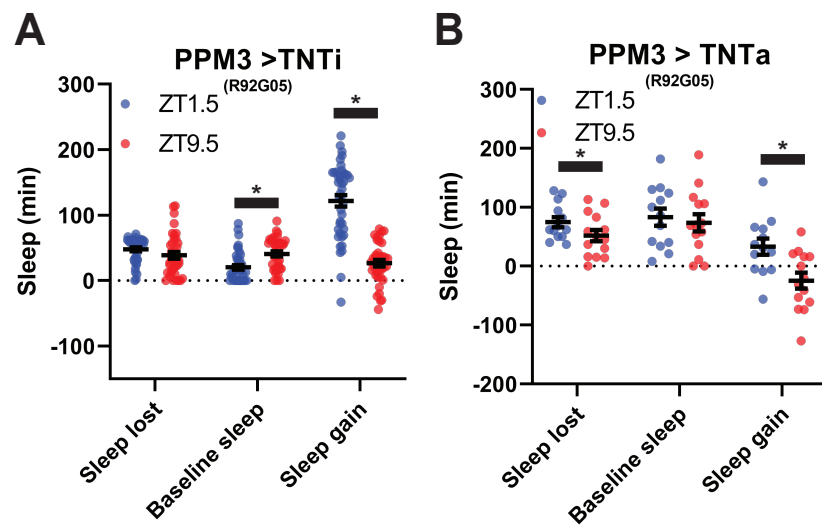

Supplement: supp [file elife_poa_e74327_Figure_7_figure_supplement_2.pdf › elife_poa_e74327_Figure_7_figure_supplement_2.pdf]
